# Supplementary material
Source: publisher figshare collection journal article supplement (https://acs.figshare.com/ndownloader/files/21304758)
Supplement: Supplementary file 1 [file 21304758]

## Supporting Information

### Stereoelectronic effects impact glycan recognition

Caitlin M. McMahon,<sup>§,†,⊥</sup> Christine R. Isabella,<sup>§,†</sup> Ian W. Windsor,<sup>†</sup> Paul Kosma,<sup>‡</sup> Ronald T. Raines,<sup>†</sup> and  
Laura L. Kiessling<sup>\*,†</sup>

<sup>†</sup>Department of Chemistry, Massachusetts Institute of Technology, Cambridge, Massachusetts 02139, United States

<sup>‡</sup>Department of Chemistry, University of Natural Resources and Life Sciences, A-1190 Vienna, Austria

<sup>§</sup>These authors contributed equally to this work.

\*email: kiesslin@mit.edu

### Table of Contents

#### I. Supporting Figures & Tables

1. **Figure S1.** Schematic of biolayer interferometry (BLI) competition assay
2. **Figure S2.** Biolayer interferometry (BLI) sensorgrams
3. **Figure S3.** Schematic of ELISA-like assay used to test binding of hItln-1
4. **Figure S4.** hItln-1 binding to monosaccharides in an ELISA-like assay
5. **Table S1.** Protein X-ray crystal structure data collection and refinement statistics
6. **Figure S5.** Electron density of KO bound to hItln-1
7. **Table S2A.** Conformational analysis of saccharides with exocyclic diols in the PDB
8. **Table S2B.** Summary of conformational analysis results
9. **Table S3.** Cartesian coordinates of optimized saccharides
10. **Table S4.** NBO Donor-acceptor interaction energies and calculated  $\Delta E_{\text{NBO}}$  of bond rotation

#### II. Synthetic Procedures

##### a. General Procedures and Materials

##### b. Experimental Procedures

- i. Synthesis of L,D-heptose-BSA conjugate (4)
- ii. Synthesis of allyl D,D-heptose (8)
- iii. Synthesis of D,D-heptose-BSA conjugate (11)
- iv. Synthesis of Gal $\beta$ -BSA conjugate (15)
- v. Synthesis of Neu5Ac-BSA conjugate (19)

#### III. References

#### IV. <sup>1</sup>H and <sup>13</sup>C NMR Spectra

#### V. MALDI Spectra of BSA Conjugates

## I. Supporting Figures & Tables

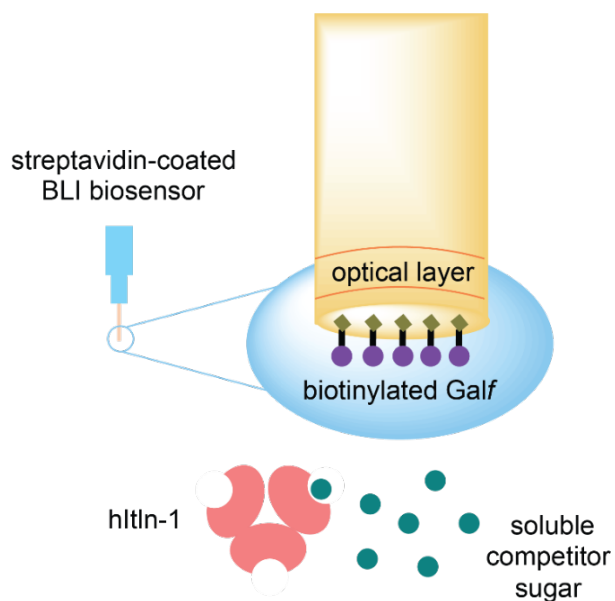

**Figure S1.** Schematic of biolayer interferometry (BLI) competition assay used to assess  $IC_{50}$  values of hItln-1 monosaccharide ligands. Biotinylated galactofuranose (Gal $\beta$ ) was immobilized on streptavidin-coated biosensors and incubated with hItln-1 in the presence of varying concentrations of soluble monosaccharides.

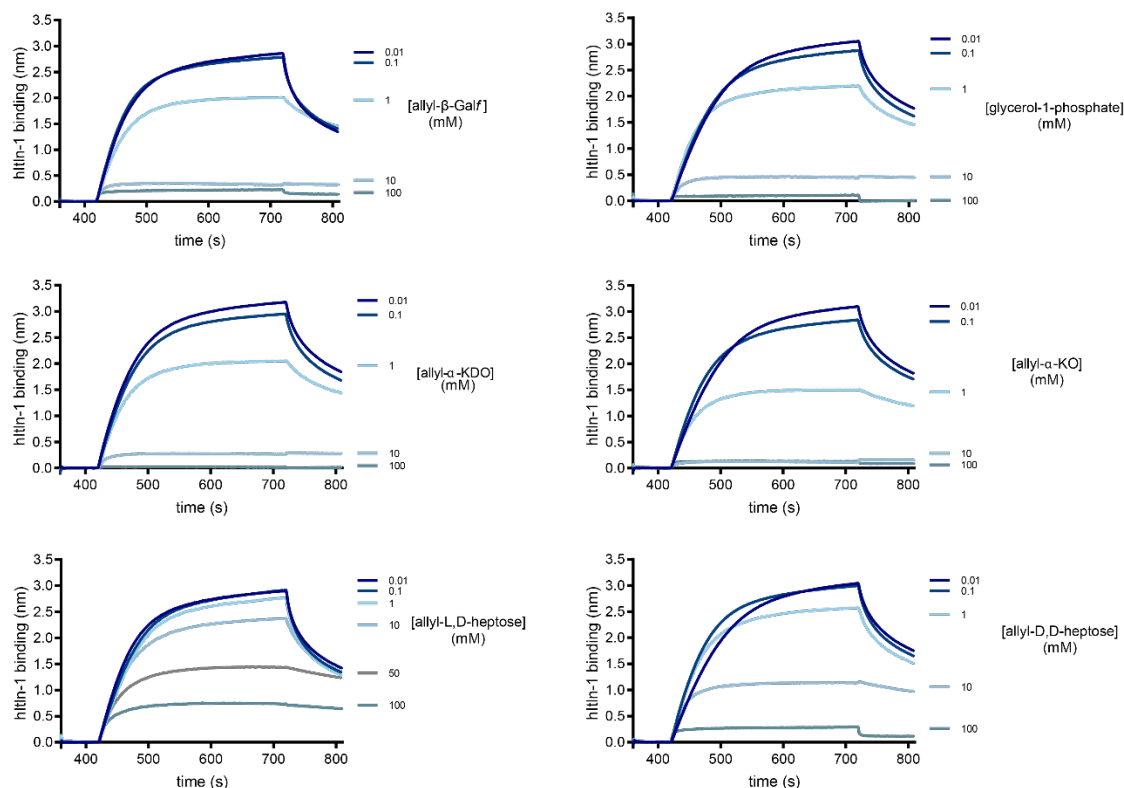

**Figure S2.** Biolayer interferometry (BLI) sensorgrams of soluble monosaccharides in competition with immobilized Galf. Real time sensorgrams are shown for competition with allyl- $\beta$ -Galf, glycerol-1-phosphate, allyl- $\alpha$ -KDO, allyl- $\alpha$ -KO, allyl-L,D-heptose, and allyl-D,D-heptose over a range of concentrations. Data from 710–720 s of each binding curve were averaged and used for IC<sub>50</sub> determination (Figure 2).

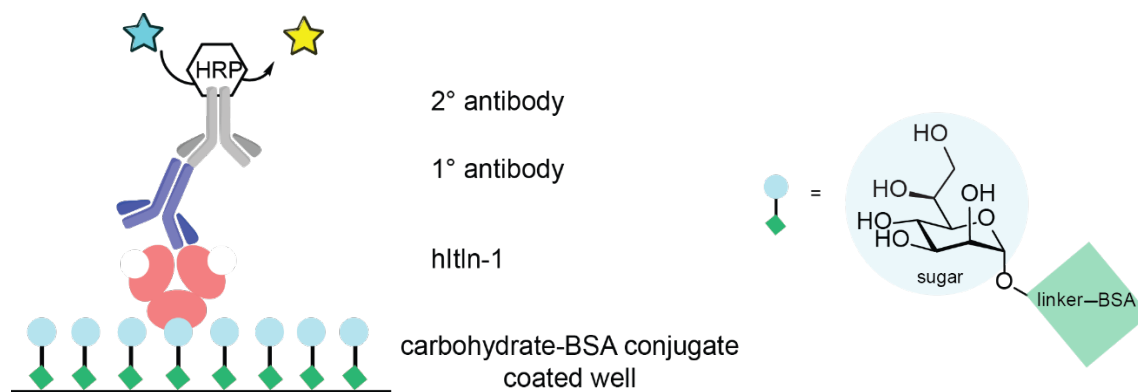

**Figure S3.** Schematic of ELISA-like assay used to test binding of hItln-1 to immobilized monosaccharide ligands. Bovine serum albumin (BSA)-conjugated sugars were coated onto a plate and incubated with various concentrations of hItln-1. Binding to hItln-1 is detected via the enzyme horseradish peroxidase (HRP) conjugated to an antibody (either a secondary as shown or a directly conjugated primary) reacting with a chromogenic HRP substrate.

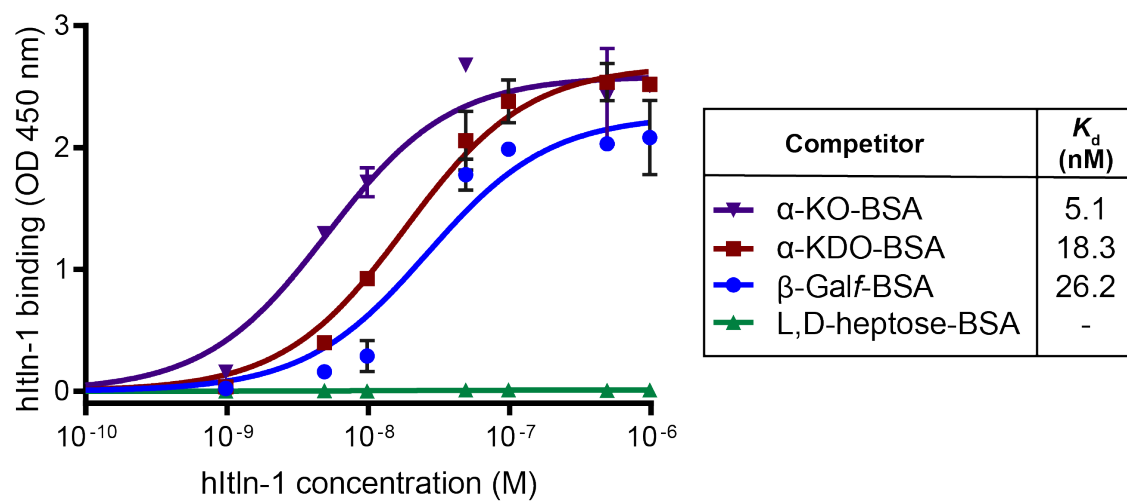

**Figure S4.** hItln-1 binding to monosaccharides in an ELISA-like assay using BSA-conjugated sugars. Data are shown as mean  $\pm$  SEM ( $n = 2$  technical replicates). Data are representative of two independent experiments. Data were fitted to a single-site binding equation (solid lines). OD, optical density.

**Table S1. Data collection and refinement statistics**

|                                                         | <b>Allyl-<math>\alpha</math>-KO bound hItln-1</b> |
|---------------------------------------------------------|---------------------------------------------------|
| PDB code                                                | 6USC                                              |
| <b>Data Collection</b>                                  |                                                   |
| X-ray source                                            | 23-ID-B                                           |
| Detector                                                | Eiger-16m                                         |
| Wavelength, Å                                           | 1.033202                                          |
| Resolution, Å                                           | 48.25–1.59 (1.79–1.59)                            |
| Space group                                             | P 2 <sub>1</sub> 3                                |
| <i>a</i> , <i>b</i> , <i>c</i> (Å)                      | 118.14, 118.14, 118.14                            |
| $\alpha$ , $\beta$ , $\gamma$ (°)                       | 90, 90, 90                                        |
| No. of Reflections                                      | 2,622,179 (70,740)                                |
| No. Unique Reflections                                  | 73,131 (6,680)                                    |
| Redundancy                                              | 35.8 (10.6)                                       |
| Mean <i>I</i> / $\sigma$                                | 16.9 (1.9)                                        |
| Completeness                                            | 99.2 (92.0)                                       |
| <i>R</i> <sub>meas</sub>                                | 0.1384 (0.8223)                                   |
| <i>R</i> <sub>merge</sub>                               | 0.1403 (0.8629)                                   |
| <i>R</i> <sub>pim</sub>                                 | 0.02237 (0.2486)                                  |
| CC <sub>1/2</sub>                                       | 0.999 (0.514)                                     |
| Wilson <i>B</i> -factor                                 | 18.3                                              |
| <b>Refinement</b>                                       |                                                   |
| Working set                                             | 73,130 (6680)                                     |
| Test set                                                | 3,522 (338)                                       |
| <i>R</i> <sub>work</sub>                                | 0.1582 (0.2666)                                   |
| <i>R</i> <sub>free</sub>                                | 0.1822 (0.3098)                                   |
| RMS deviation bond lengths (Å)                          | 0.007                                             |
| RMS deviation bond angles (°)                           | 0.86                                              |
| Protein residues                                        | 558                                               |
| Total number of atoms                                   | 4811                                              |
| Protein                                                 | 4438                                              |
| Allyl- $\alpha$ -KO                                     | 47                                                |
| Solvent                                                 | 326                                               |
| Mean <i>B</i> -factor (Å <sup>2</sup> )                 | 21.94                                             |
| Protein                                                 | 21.35                                             |
| Allyl- $\alpha$ -KO                                     | 29.38                                             |
| Solvent                                                 | 28.88                                             |
| Ramachandran favored, allowed, outliers (%)             | 97, 3, 0                                          |
| Values in parentheses are for highest-resolution shell. |                                                   |

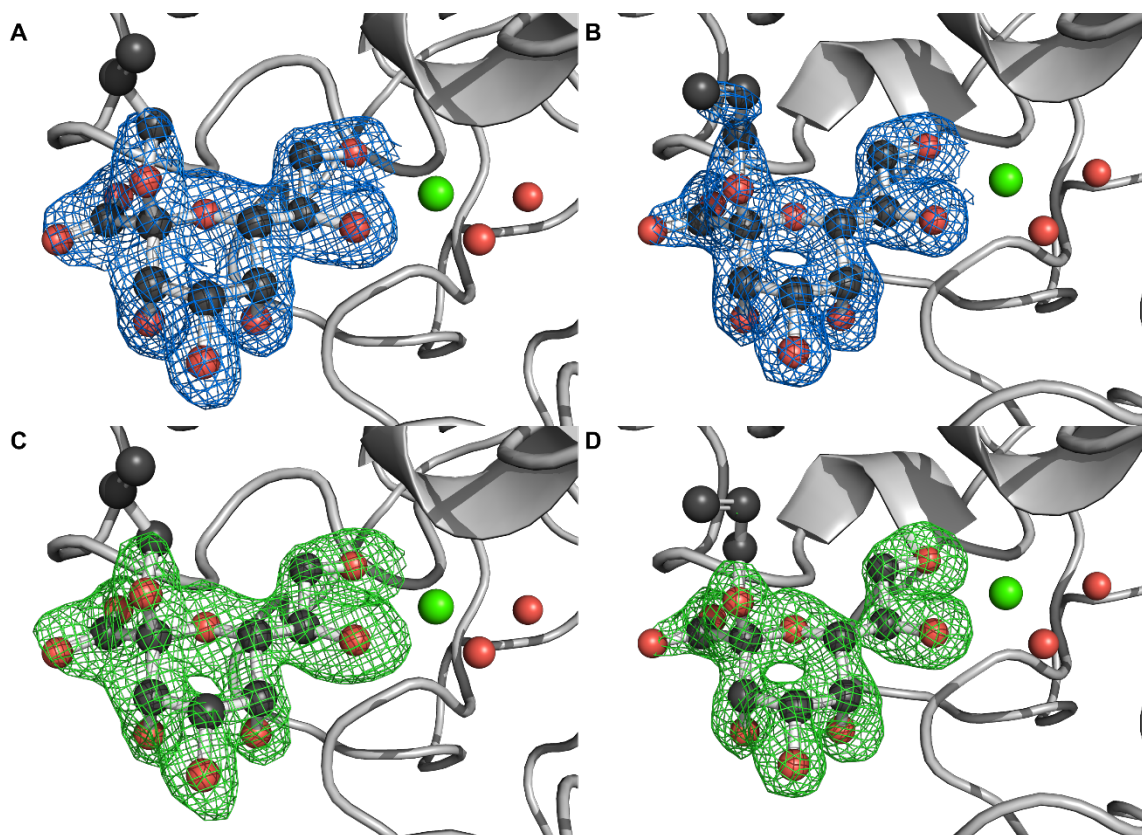

**Figure S5.** Electron density of allyl- $\alpha$ -KO bound to hItln-1. Final structures of allyl- $\alpha$ -KO bound to chain A (A) and chain B (B) shown with the  $2F_o - F_c$  map contoured at  $1.0\sigma$ . Both allyl- $\alpha$ -KO ligands were removed from the final model and simulated annealing refinement was performed. Final structures of allyl- $\alpha$ -KO bound to chain A (C) and chain B (D) are shown with the ensuing the  $F_o - F_c$  map contoured at  $3.0\sigma$ . Maps were prepared with phenix.refine and visualized with PyMOL.

**Table S2A.** Conformational analysis of saccharides containing exocyclic diols in the PDB.

| PDB ID          | Ligand ID | Residue | Trans to ring<br>C–O:<br>ring,<br>side-chain | Proximal<br>rotamer<br>(y) | Distal<br>rotamer<br>(z) | Glycan<br>interactions | Protein<br>interactions | Interacting residues                               |
|-----------------|-----------|---------|----------------------------------------------|----------------------------|--------------------------|------------------------|-------------------------|----------------------------------------------------|
| <b>Pyranose</b> |           |         |                                              |                            |                          |                        |                         |                                                    |
| 1q9w            | KDO       | B301    | H,O                                          | tg                         | gt                       | no                     | no                      |                                                    |
|                 | KDO       | B302    | H,O                                          | tg                         | gt                       | 1-Oz                   | no                      |                                                    |
|                 | KDO       | B303    | H,O                                          | tg                         | gt                       | no                     | 1-Oy                    | Tyr92 mainchain                                    |
|                 | KDO       | C311    | H,O                                          | tg                         | gt                       | no                     | no                      |                                                    |
|                 | KDO       | C312    | H,O                                          | tg                         | gt                       | no                     | no                      |                                                    |
|                 | KDO       | C313    | H,O                                          | tg                         | gt                       | 1-Oz                   | 1-Oy                    | Tyr92 mainchain                                    |
| 2r1y            | KDO       | B212    | H,O                                          | tg                         | gg                       | 1-Oz                   | no                      |                                                    |
|                 | KDR       | B213    | H,O                                          | tg                         | tg                       | no                     | 1-Oz                    | Asn52 sidechain                                    |
| 2r23            | KO1       | B214    | H,O                                          | tg                         | gg                       | no                     | no                      |                                                    |
| 2r2b            | KDO       | B215    | H,O                                          | tg                         | gg                       | no                     | no                      |                                                    |
| 2r2h            | KO2       | B212    | H,O                                          | tg                         | gg                       | no                     | 1-Oy                    | Asn30 sidechain                                    |
| 2ria            | 289       | A356    | O,H                                          | gt                         | gt                       | no                     | 2-Oy                    | Arg343 sidechain                                   |
|                 | 289       | B356    | O,H                                          | gt                         | gt                       | no                     | no                      |                                                    |
|                 | 289       | C356    | O,H                                          | gt                         | gt                       | no                     | no                      |                                                    |
| 2rib            | GMH       | A356    | O,H                                          | gg                         | gt                       | no                     | Ca                      | coordinates calcium                                |
|                 | GMH       | B356    | O,H                                          | gg                         | gt                       | no                     | Ca                      |                                                    |
|                 | GMH       | C356    | O,H                                          | gg                         | gt                       | no                     | Ca                      |                                                    |
| 2ric            | GMH       | A356    | O,H                                          | gg                         | gt                       | no                     | Ca                      | coordinates calcium                                |
|                 | GMH       | B356    | O,H                                          | gg                         | gt                       | no                     | Ca                      |                                                    |
|                 | GMH       | C356    | O,H                                          | gg                         | gt                       | no                     | Ca                      |                                                    |
| 2rie            | 293       | A356    | O,H                                          | gg                         | gt                       | no                     | Ca                      | coordinates calcium                                |
|                 | 293       | B356    | O,H                                          | gg                         | gt                       | no                     | Ca                      |                                                    |
|                 | 293       | C356    | O,H                                          | gg                         | gt                       | no                     | Ca                      |                                                    |
| 3dur            | KDO       | A303    | H,O                                          | tg                         | gg                       | no                     | 2-Oy, 1-Oz              | Tyr92 mainchain,<br>Lys30 sidechain<br>(both)      |
|                 | KDO       | D303    | H,O                                          | tg                         | gg                       | no                     | 2-Oy                    | Tyr92 mainchain,<br>Lys30 sidechain                |
| 3dus            | KDO       | A107    | H,O                                          | tg                         | gg                       | no                     | 2-Oy, 1-Oz              | Tyr92 mainchain,<br>Lys30 sidechain<br>(both)      |
|                 | KDO       | C108    | H,O                                          | tg                         | gg                       | no                     | 2-Oy, 2-Oz              | Tyr92 mainchain,<br>Lys30 sidechain<br>(both), PEG |
| 3duu            | KDO       | B114    | H,O                                          | tg                         | gg                       | no                     | 2-Oy, 1-Oz              | Tyr92 mainchain,<br>Lys30 sidechain<br>(both)      |
|                 | KDO       | D114    | H,O                                          | tg                         | gg                       | no                     | 2-Oy                    | Tyr92 mainchain,<br>Lys30 sidechain                |
| 3dv6            | KDO       | B114    | H,O                                          | tg                         | gg                       | no                     | 2-Oy, 1-Oz              | Tyr33, Arg52 (both)                                |
| 3etn            | CMK       | B500    | H,O                                          | tg                         | gg                       | no                     | 1-Oy,1-Oz               | Asn96 both                                         |
|                 | CMK       | C500    | H,O                                          | tg                         | gg                       | no                     | 1-Oy,1-Oz               | Asn96 both                                         |
|                 | CMK       | D500    | H,O                                          | tg                         | gg                       | no                     | 1-Oy,1-Oz               | Asn96 both                                         |

|      |     |       |     |    |    |      |            |                                                               |
|------|-----|-------|-----|----|----|------|------------|---------------------------------------------------------------|
| 3hzm | KDO | B303  | H,O | tg | gt | no   | no         |                                                               |
| 3hzv | KDA | A301  | H,O | tg | gt | 1-Oy | no         |                                                               |
|      | KDO | A303  | H,O | tg | gt | no   | Oz-1       | Arg27 sidechain                                               |
| 3k2v | CMK | A1    | H,O | tg | gt | no   | 1-Oy, 1-Oz | Asn242 mainchain,<br>His307 sidechain                         |
|      | CMK | B2    | H,O | tg | gt | no   | 1-Oy       | Asn242 mainchain                                              |
| 3k8d | KDO | A1244 | H,O | tg | gg | no   | 2-Oy       | His181 and Gln211<br>sidechains                               |
|      | KDO | B1244 | H,O | tg | gg | no   | 2-Oy       | His181 and Gln211<br>sidechains                               |
|      | KDO | C1244 | H,O | tg | gg | no   | 2-Oy       | His181 and Gln211<br>sidechains                               |
|      | KDO | D1244 | H,O | tg | gg | no   | 2-Oy       | His181 and Gln211<br>sidechains                               |
| 3okd | KDO | B214  | H,O | tg | gg | no   | no         |                                                               |
| 3okk | KDO | B225  | H,O | tg | gg | 1-Oz | 2-Oy       | Tyr92 mainchain,<br>Asn27 sidechain                           |
| 3okl | KDO | B216  | H,O | tg | gg | no   | no         |                                                               |
| 3sy0 | KDA | B301  | H,O | tg | gg | no   | no         |                                                               |
|      | KDO | B303  | H,O | tg | gg | no   | no         |                                                               |
| 3t4y | KDO | B303  | H,O | tg | gg | no   | no         |                                                               |
| 3t65 | KDO | B303  | H,O | tg | gg | no   | 1-Oy       | Asn30 sidechain                                               |
| 3t77 | KDO | B303  | H,O | tg | gt | no   | 1-Oy       | Tyr92 mainchain                                               |
| 3v0w | GMH | H307  | O,H | gg | gt | 1-Oy | no         |                                                               |
|      | GM0 | H308  | O,H | gg | gt | no   | no         |                                                               |
|      | KDO | H309  | H,O | tg | gt | 1-Oy | no         |                                                               |
| 4e52 | GMH | B404  | O,H | gg | gt | no   | Ca         | coordinates calcium                                           |
|      | GMH | C404  | O,H | gg | gt | no   | Ca         | coordinates calcium                                           |
| 4hgw | KDO | B302  | H,O | tg | gg | no   | 1-Oy       | Asn93 sidechain                                               |
| 4m7j | KDA | H303  | H,O | tg | gt | no   | no         |                                                               |
|      | KDO | H305  | H,O | tg | tg | 2-Oz | 1-Oy, 2-Oz | Thr99 sidechain,<br>Asn28 and Tyr32<br>sidechain              |
| 4o9k | CMK | A401  | H,O | tg | gg | no   | 2-Oy       | Leu240 mainchain,<br>Asn321 sidechain                         |
|      | CMK | B401  | H,O | tg | gt | no   | 2-Oy, 1-Oz | Leu240 mainchain,<br>Asn321 sidechain and<br>Arg304 sidechain |
| 4pf6 | KDO | A401  | H,O | tg | gg | no   | 1-Oy, 1-Oz | Arg42 sidechain                                               |
| 5fvn | KDO | A417  | H,O | tg | gt | no   | 1-Oz       | Arg199 mainchain                                              |
|      | KDO | B409  | H,O | tg | gt | no   | no         |                                                               |
|      | GMH | B410  | O,H | gg | gt | no   | no         |                                                               |
|      | KDO | B411  | H,O | tg | gt | no   | 1-Oz       | Arg199 mainchain                                              |
|      | KDO | C415  | H,O | tg | gt | 1-Oy | no         |                                                               |
|      | GMH | C416  | H,O | tg | gt | no   | no         |                                                               |
|      | KDO | C417  | H,C | gg | tg | no   | Ca         | coordinates calcium                                           |
|      | KDO | C427  | H,O | tg | gt | no   | no         |                                                               |
|      | KDO | C428  | H,O | tg | gt | no   | 1-Oz       | Arg199 mainchain                                              |
|      | KDO | D425  | H,O | tg | gt | no   | no         |                                                               |
|      | KDO | D426  | H,O | tg | gt | no   | 1-Oz       | Arg199 mainchain                                              |



|                             |     |        |     |    |       |            |      |                               |
|-----------------------------|-----|--------|-----|----|-------|------------|------|-------------------------------|
|                             | KDO | E407   | H,O | tg | gt    | no         | no   |                               |
|                             | KDO | E408   | H,O | tg | gt    | no         | 1-Oz | Arg199 mainchain              |
|                             | KDO | F408   | H,O | tg | gg    | 1-Oz       | no   |                               |
|                             | KDO | F410   | H,C | gg | tg    | no         | Ca   | coordinates calcium           |
|                             | KDO | F420   | H,O | tg | gt    | no         | no   |                               |
|                             | KDO | F421   | H,O | tg | gt    | no         | 1-Oz | Arg199 mainchain              |
| 5oxr                        | GMH | B405   | O,H | gg | gt    | no         | Ca   | coordinates calcium           |
|                             | GMH | B406   | O,H | gg | tg    | 1-Oz       | no   |                               |
|                             | GMH | C405   | O,H | gg | gt    | no         | Ca   | coordinates calcium           |
| 5oxs                        | GMH | A405   | O,H | gg | tg    | 2-Oz       | no   |                               |
|                             | GMH | B404   | O,H | gg | gt    | no         | Ca   | coordinates calcium           |
|                             | GMH | B405   | O,H | gg | gt    | no         | no   |                               |
|                             | GMH | C404   | O,H | gg | gt    | no         | Ca   | coordinates calcium           |
| 6c5h                        | KDO | H409   | H,O | tg | gt    | no         | no   |                               |
|                             | KDO | H411   | H,O | tg | gg    | 1-Oz       | 1-Oz | Asn28 sidechain               |
| 6c5k                        | KDO | A406   | H,O | tg | gg    | no         | no   |                               |
|                             | KDO | A408   | H,O | tg | gg    | 1-Oz       | 1-Oz | Asn28 sidechain               |
|                             | KDO | H406   | H,O | tg | gg    | no         | no   |                               |
|                             | KDO | H408   | H,O | tg | gg    | 1-Oz       | 1-Oz | Asn28 sidechain               |
| <b>Furanose<sup>a</sup></b> |     |        |     |    |       |            |      |                               |
| 2vk2                        | GZL | A1298  | O,C | gt | gt    | 3-Oy, 1-Oz |      |                               |
| 2ydg                        | A5C | A1131  | H,H | gg | tg    |            | 1-Oy | Asn65 sidechain               |
| 4xad                        | 3ZW | A207   | O,H | gg | tg    |            | 3-Oy | Ser50, Asn59, Arg61 sidechain |
| 4wmy                        | 3S6 | A404   | O,H | gg | gt    |            | Ca   | Both coordinated              |
| 5lsh                        | KTS | A205_1 | O,H | gg | tg/gt |            | no   |                               |
|                             | KTS | A205_2 | O,H | gg | gg    |            | 2-Oy | Arg98 and Asp102 sidechain    |

<sup>a</sup> GLZ, 3ZW, 3S6, and KTS are all  $\beta$ -D-galactofuranose-containing

**Table S2B.** Summary of conformational analysis results

| Proximal rotamer                                    | Number of instances | Distal rotamer | Number of instances |
|-----------------------------------------------------|---------------------|----------------|---------------------|
| Pyranose, equatorial hydrogen (67 structures)       |                     |                |                     |
| gg                                                  | 2                   | gg             | 0                   |
|                                                     |                     | tg             | 2                   |
|                                                     |                     | gt             | 0                   |
| tg                                                  | 65                  | gg             | 34                  |
|                                                     |                     | tg             | 2                   |
|                                                     |                     | gt             | 29                  |
| gt                                                  | 0                   |                | 0                   |
| Pyranose, equatorial hydroxyl group (24 structures) |                     |                |                     |
| gg                                                  | 21                  | gg             | 0                   |
|                                                     |                     | tg             | 2                   |
|                                                     |                     | gt             | 19                  |
| tg                                                  | 0                   |                | 0                   |
| gt                                                  | 3                   | gg             | 0                   |
|                                                     |                     | tg             | 0                   |
|                                                     |                     | gt             | 3                   |
| Furanose (6 structures)                             |                     |                |                     |
| gg                                                  | 5                   | gg             | 1                   |
|                                                     |                     | tg             | 3*                  |
|                                                     |                     | gt             | 2*                  |
| tg                                                  | 0                   |                | 0                   |
| gt                                                  | 1                   | gg             | 0                   |
|                                                     |                     | tg             | 0                   |
|                                                     |                     | gt             | 1                   |

\*one structure showed alternate conformations with distal hydroxyl in tg and gt

**Table S3.** Cartesian coordinates of saccharides optimized at the M06-2X/6-311+G(d,p); IEFPCM:water level of theory

| KO |             |             |             | DD_gtgt |             |             |             |
|----|-------------|-------------|-------------|---------|-------------|-------------|-------------|
| C  | 0.85349500  | -1.87232600 | -0.15394700 | C       | -1.25090400 | 0.99202400  | 0.67333800  |
| O  | -0.24235900 | 0.08517200  | 0.72447000  | C       | -0.64381300 | -0.37806100 | 0.39774500  |
| C  | -0.14406900 | -1.89765100 | -1.31608400 | C       | 1.03284000  | 0.53549900  | -1.03003400 |
| O  | -2.14431300 | -1.94466900 | 0.07189900  | C       | 0.54444400  | 1.96160500  | -0.78948200 |
| C  | -1.45575000 | -1.20247600 | -0.93245100 | C       | -0.15930200 | 2.05495000  | 0.56688600  |
| O  | -0.39478000 | -3.23370300 | -1.71959200 | H       | 0.13424400  | -0.57492900 | 1.14480100  |
| C  | -1.15197500 | 0.17934800  | -0.36659900 | H       | 1.39276100  | 2.64646400  | -0.81411200 |
| O  | 1.47707000  | 0.00528600  | 2.71277600  | H       | 0.56792500  | 1.89111700  | 1.36626200  |
| C  | 1.02000300  | -0.44623300 | 0.38166200  | O       | -0.05407900 | -0.36717400 | -0.90727700 |
| O  | 3.08177400  | -0.90822200 | 1.43785400  | O       | 2.04510000  | 0.27719900  | -0.11265400 |
| C  | 1.94182800  | -0.44697900 | 1.65263600  | C       | 2.66970200  | -0.99738800 | -0.29030300 |
| O  | 1.60126300  | 0.29029000  | -0.66791600 | H       | 3.08602600  | -1.06591400 | -1.30151800 |
| C  | -2.40071200 | 0.89023900  | 0.15695500  | H       | 1.91674300  | -1.78447000 | -0.16760900 |
| O  | -3.40310400 | 0.91705400  | -0.84607100 | C       | 5.00574100  | -1.41607100 | 0.45746000  |
| C  | -2.06039500 | 2.28333100  | 0.65221800  | H       | 5.74776900  | -1.54021900 | 1.23720700  |
| O  | -3.22475400 | 2.84370500  | 1.23884900  | H       | 5.33800400  | -1.53569500 | -0.56905800 |
| C  | 1.93734400  | 1.63268800  | -0.32144500 | C       | 3.73970600  | -1.13798900 | 0.74421500  |
| O  | 0.42938100  | -2.74924200 | 0.87834600  | H       | 3.41857300  | -1.01750200 | 1.77578400  |
| C  | 2.26576800  | 2.36921900  | -1.58118300 | C       | -1.61342200 | -1.55653100 | 0.43038600  |
| C  | 3.40234200  | 3.02832900  | -1.77380500 | H       | -1.98569400 | -1.66506100 | 1.45135300  |
| H  | 4.17758300  | 3.04591000  | -1.01398600 | C       | -2.80076300 | -1.38127000 | -0.50297400 |
| H  | 1.82786400  | -2.23070700 | -0.48523100 | H       | -3.34138300 | -0.46844100 | -0.23306800 |
| H  | 0.29048900  | -1.36722600 | -2.16620900 | H       | -2.44930600 | -1.28877600 | -1.53760800 |
| H  | -2.46975500 | -2.75677800 | -0.33110800 | O       | -0.89483100 | -2.74460600 | 0.14260900  |
| H  | -2.08838000 | -1.09694300 | -1.81781300 | H       | -0.46896600 | -2.61920000 | -0.71429400 |
| H  | -0.28860100 | -3.79061800 | -0.93767400 | O       | -3.64181600 | -2.51358000 | -0.35071600 |
| H  | -0.70802400 | 0.78158800  | -1.17197300 | H       | -4.40188300 | -2.40602600 | -0.92882700 |
| H  | -2.81687000 | 0.30764000  | 0.98125700  | H       | 1.38349200  | 0.41213500  | -2.05997800 |
| H  | -3.14591300 | 1.55067200  | -1.52536900 | H       | -2.02128900 | 1.21196500  | -0.07898100 |
| H  | -1.72053700 | 2.89524800  | -0.19589300 | O       | -0.33446900 | 2.36506800  | -1.82772900 |
| H  | -2.99852300 | 3.70354200  | 1.60360000  | H       | -0.91539700 | 1.62745400  | -2.05197000 |
| H  | 2.78757300  | 1.63830200  | 0.36949200  | O       | -0.71058000 | 3.34244600  | 0.76933200  |
| H  | -0.45980400 | -2.47214400 | 1.14469600  | H       | -1.14634300 | 3.59922100  | -0.05410900 |
| H  | 1.49865300  | 2.35355500  | -2.35205600 | O       | -1.82655000 | 0.97052100  | 1.96207600  |
| H  | 3.59225300  | 3.57485200  | -2.69004100 | H       | -2.06283600 | 1.87827600  | 2.18718300  |
| H  | -1.24619100 | 2.21237600  | 1.37811700  |         |             |             |             |
| H  | 1.07948500  | 2.10043100  | 0.17754300  |         |             |             |             |

| DD_gggt |             |             |             | LD_gggt |             |             |             |
|---------|-------------|-------------|-------------|---------|-------------|-------------|-------------|
| C       | 1.12682100  | 0.95322000  | -0.57972400 | C       | 1.43296500  | -0.90169400 | 0.68699200  |
| C       | 0.66899800  | -0.38602800 | -0.00557100 | C       | 0.71924500  | 0.39063800  | 0.30483600  |
| C       | -1.29525900 | 0.61193900  | 0.94914600  | C       | -0.87532300 | -0.78204200 | -1.03696800 |
| C       | -0.91562500 | 2.00477900  | 0.45926500  | C       | -0.24021100 | -2.13365900 | -0.72515800 |
| C       | -0.06694500 | 1.88099000  | -0.80306600 | C       | 0.45907900  | -2.07551600 | 0.63288800  |
| H       | 0.07632700  | -0.91821000 | -0.75942400 | H       | -0.04509200 | 0.60949500  | 1.06021000  |
| H       | -1.81823200 | 2.57888000  | 0.24692900  | H       | -1.01072600 | -2.90537100 | -0.71376900 |
| H       | -0.67928000 | 1.46429000  | -1.60662100 | H       | -0.28937800 | -1.94338600 | 1.41840700  |
| O       | -0.12331800 | -0.15107200 | 1.16578500  | O       | 0.10965700  | 0.23472100  | -0.98096500 |
| O       | -2.12797500 | 0.03955600  | -0.00671600 | O       | -1.89693400 | -0.57193400 | -0.11662700 |
| C       | -2.66524300 | -1.22648600 | 0.38694100  | C       | -2.68202400 | 0.59270700  | -0.38952400 |
| H       | -3.27462200 | -1.10320700 | 1.28913300  | H       | -3.22712800 | 0.45639800  | -1.33003200 |
| H       | -1.83911500 | -1.90981200 | 0.61445800  | H       | -2.01519700 | 1.45619700  | -0.49464800 |
| C       | -4.75334300 | -2.12200900 | -0.62758100 | C       | -4.93809100 | 0.89453400  | 0.61696500  |
| H       | -5.30543800 | -2.53039800 | -1.46569300 | H       | -5.58422800 | 1.07342100  | 1.46815500  |
| H       | -5.27960500 | -2.02993300 | 0.31742600  | H       | -5.41086100 | 0.80363800  | -0.35599000 |
| C       | -3.48255800 | -1.75679000 | -0.74685700 | C       | -3.62119400 | 0.79886800  | 0.75500600  |
| H       | -2.96597900 | -1.85001800 | -1.69887800 | H       | -3.15855900 | 0.88741100  | 1.73489500  |
| C       | 1.79248500  | -1.29623000 | 0.48939900  | C       | 1.66956500  | 1.57627700  | 0.18063900  |
| H       | 1.31031400  | -2.20904300 | 0.86318000  | C       | 0.89954500  | 2.86679700  | -0.04660600 |
| C       | 2.77803100  | -1.70187100 | -0.58567600 | H       | 0.41779700  | 2.83654000  | -1.03069500 |
| H       | 2.23687700  | -1.95504200 | -1.50275200 | H       | 0.12085800  | 2.95851800  | 0.71970200  |
| H       | 3.44916900  | -0.86642100 | -0.79872700 | O       | 1.81636000  | 3.94565100  | 0.03684200  |
| O       | 2.51490100  | -0.67268900 | 1.53841900  | H       | 1.35698500  | 4.75683200  | -0.19633600 |
| H       | 1.89320100  | -0.49552300 | 2.25312000  | H       | -1.24809400 | -0.75460600 | -2.06607600 |
| O       | 3.49900100  | -2.82546100 | -0.09535600 | H       | 2.25102900  | -1.07303700 | -0.02613200 |
| H       | 4.20664200  | -3.02482200 | -0.71403100 | O       | 0.68141400  | -2.49463800 | -1.74165100 |
| H       | -1.78161700 | 0.66006200  | 1.92903300  | H       | 1.19283100  | -1.71524300 | -1.99211700 |
| H       | 1.82301900  | 1.41845800  | 0.13225300  | O       | 1.13710700  | -3.28666400 | 0.91341400  |
| O       | -0.21084200 | 2.71221200  | 1.46666400  | H       | 1.61459900  | -3.53862900 | 0.11210700  |
| H       | 0.41637000  | 2.11256900  | 1.88946900  | O       | 1.95580900  | -0.74143400 | 1.99075200  |
| O       | 0.38397800  | 3.14766000  | -1.24851600 | H       | 2.28721300  | -1.60140100 | 2.27452400  |
| H       | 0.70680800  | 3.62503200  | -0.47297300 | H       | 2.23263500  | 1.66106800  | 1.11308100  |
| O       | 1.78241400  | 0.71147000  | -1.81035900 | O       | 2.62556200  | 1.34811300  | -0.84021400 |
| H       | 1.95572100  | 1.57064100  | -2.21293100 | H       | 2.14217500  | 1.20016800  | -1.66212000 |

|         |             |             |             |   |             |             |             |
|---------|-------------|-------------|-------------|---|-------------|-------------|-------------|
| LD_gtgt |             |             |             | H | 2.76963000  | -1.74561900 | 1.89698200  |
| C       | -1.18963400 | 1.13901600  | 0.44739600  | C | -1.87898400 | -1.16513100 | -0.52237300 |
| C       | -0.75794000 | -0.24775600 | -0.02717100 | C | -2.83048400 | -1.60355700 | 0.57038300  |
| C       | 1.28557400  | 0.61883600  | -0.95100800 | H | -2.27519200 | -2.19307400 | 1.30979700  |
| C       | 0.94929200  | 2.05042400  | -0.55057900 | H | -3.25209500 | -0.72602400 | 1.06138400  |
| C       | 0.03720500  | 2.02710400  | 0.67227500  | O | -3.84994500 | -2.38694100 | -0.03681400 |
| H       | -0.19884800 | -0.75119500 | 0.77185000  | H | -4.48753300 | -2.62665600 | 0.64082900  |
| H       | 1.86516800  | 2.59624600  | -0.32137400 | H | 1.81147800  | 0.59195600  | -1.91106300 |
| H       | 0.59215800  | 1.62817500  | 1.52510700  | H | -1.82785200 | 1.59224900  | -0.32610500 |
| O       | 0.08221100  | -0.09222800 | -1.18012500 | O | 0.32430800  | 2.73289600  | -1.62508000 |
| O       | 2.04829300  | 0.05850100  | 0.06662000  | H | -0.30321800 | 2.13539800  | -2.05074800 |
| C       | 2.52423200  | -1.25741200 | -0.23168500 | O | -0.37985700 | 3.33175600  | 1.03078900  |
| H       | 3.14916400  | -1.22818600 | -1.13117100 | H | -0.64208300 | 3.78238000  | 0.21718200  |
| H       | 1.66652100  | -1.91300400 | -0.42269000 | O | -1.90839300 | 1.02150800  | 1.65955700  |
| C       | 4.54951800  | -2.19022700 | 0.87189600  | H | -2.00469200 | 1.91252100  | 2.01747500  |
| H       | 5.06993800  | -2.56731800 | 1.74422100  | H | -2.44608900 | -0.62759800 | -1.29526000 |
| H       | 5.08899400  | -2.19483400 | -0.07009600 | O | -1.29932600 | -2.33501600 | -1.07681800 |
| C       | 3.29992900  | -1.74859700 | 0.94799100  | H | -0.64602000 | -2.04543500 | -1.72409500 |

**Table S4.** NBO Donor-acceptor interaction energies and calculated  $\Delta E_{\text{NBO}}$  of bond rotation.

| Glycan conformation                                  | Interaction                                                   | Energy (kcal/mol) |
|------------------------------------------------------|---------------------------------------------------------------|-------------------|
| DD-heptose-gtgt                                      | $\sigma_{\text{C19-H20}} \rightarrow \sigma^*_{\text{C2-O9}}$ | 5.34              |
|                                                      | $\sigma_{\text{C1-C2}} \rightarrow \sigma^*_{\text{C19-O24}}$ | 2.42              |
|                                                      | $\sigma_{\text{C19-C21}} \rightarrow \sigma^*_{\text{C2-H6}}$ | 1.95              |
|                                                      | $\sigma_{\text{C2-H6}} \rightarrow \sigma^*_{\text{C19-C21}}$ | 3.54              |
|                                                      | Sum of all interactions                                       | 13.25             |
| DD-heptose-gggt                                      | $\sigma_{\text{C19-C21}} \rightarrow \sigma^*_{\text{C2-O9}}$ | 2.72              |
|                                                      | $\sigma_{\text{C2-H6}} \rightarrow \sigma^*_{\text{C19-O24}}$ | 4.93              |
|                                                      | $\sigma_{\text{C19-H20}} \rightarrow \sigma^*_{\text{C1-C2}}$ | 3.93              |
|                                                      | $\sigma_{\text{C1-C2}} \rightarrow \sigma^*_{\text{C19-H20}}$ | 1.48              |
|                                                      | Sum of all interactions                                       | 13.06             |
| <b>DD-heptose <math>\Delta E_{\text{NBO}}</math></b> |                                                               | <b>0.19</b>       |
| LD-heptose-gggt                                      | $\sigma_{\text{C19-H33}} \rightarrow \sigma^*_{\text{C2-O9}}$ | 4.73              |
|                                                      | $\sigma_{\text{C19-H20}} \rightarrow \sigma^*_{\text{C1-C2}}$ | 2.06              |
|                                                      | $\sigma_{\text{C2-H6}} \rightarrow \sigma^*_{\text{C19-O34}}$ | 4.52              |
|                                                      | $\sigma_{\text{C1-C2}} \rightarrow \sigma^*_{\text{C19-C20}}$ | 1.64              |
|                                                      | Sum of all interactions                                       | 13.25             |
| LD-heptose-gtgt                                      | $\sigma_{\text{C19-H33}} \rightarrow \sigma^*_{\text{C2-H6}}$ | 2.86              |
|                                                      | $\sigma_{\text{C19-C20}} \rightarrow \sigma^*_{\text{C2-O9}}$ | 2.15              |
|                                                      | $\sigma_{\text{C2-H6}} \rightarrow \sigma^*_{\text{C19-H33}}$ | 2.57              |
|                                                      | $\sigma_{\text{C1-C2}} \rightarrow \sigma^*_{\text{C19-O34}}$ | 2.12              |
|                                                      | Sum of all interactions                                       | 9.7               |
| <b>LD-heptose <math>\Delta E_{\text{NBO}}</math></b> |                                                               | <b>3.25</b>       |

## II. Synthetic Procedures

### a. General Procedures and Materials

All reagents and solvents were purchased from Sigma Aldrich and used without further purification unless otherwise noted. Methanol was dried over 4Å molecular sieves or neutral alumina. Dichloromethane was dried over 4Å molecular sieves. Aqueous solutions of salts were saturated unless stated otherwise. All reactions were run under an inert N<sub>2</sub> atmosphere unless otherwise noted. All glassware and stir bars were dried prior to use. Analytical thin layer chromatography (TLC) was carried out on E. Merck (Darnstadt) or Silicycle TLC plates pre-coated with silica gel 60 F254 (250-µm layer thickness) or on HPTLC plates with a 2.5-cm concentration zone (Merck). Analyte visualization was accomplished using a UV lamp and by charring with *p*-anisaldehyde or potassium permanganate solution. For column chromatography, silica gel (0.040–0.063 mm) was used. Optical rotations were measured with an Anton Paar MCP100 Polarimeter. Proton and carbon magnetic resonance spectra (<sup>1</sup>H NMR and <sup>13</sup>C NMR) were recorded on a Bruker Avance III 600 instrument or a Bruker Avance DRX 600 instrument (<sup>1</sup>H NMR at 600 MHz and <sup>13</sup>C NMR at 151 MHz) using standard Bruker NMR software. Solvent resonance was used as the internal standard - <sup>1</sup>H spectra were referenced to 7.26 ppm (CDCl<sub>3</sub>) and 0.00 ppm (D<sub>2</sub>O, external calibration to 2,2-dimethyl-2-silapentane-5-sulfonic acid) or 0.00 ppm (D<sub>2</sub>O, external calibration to 3-(trimethylsilyl)propionic acid-*d*<sub>4</sub> sodium salt). <sup>13</sup>C spectra were referenced to 77.00 ppm (CDCl<sub>3</sub>) and 67.40 ppm (D<sub>2</sub>O, external calibration to 1,4-dioxane) or to 0.00 ppm (D<sub>2</sub>O, external calibration to 3-(trimethylsilyl)propionic acid-*d*<sub>4</sub> sodium salt). Some assignments were based on COSY and HSQC data. <sup>1</sup>H NMR data are reported as follows: chemical shift, multiplicity (s = singlet, d = doublet, t = triplet, q = quartet, quint = quintet, dd = doublet of doublets, ddd = doublet of doublet of doublets, td = triplet of doublets, qd = quartet of doublets, m = multiplet, br. s. = broad singlet), coupling constants (Hz), and integration. ESI-MS data were obtained on a Micromass Q-TOF Ultima Global instrument. DART-TOF MS data were obtained on a JEOL AccuTOF DART instrument at 300 °C. Matrix-assisted laser desorption ionization time-of-flight mass spectra (MALDI-TOF-MS) were obtained on Bruker Autoflex MALDI TOF/TOF or Bruker microflex LRF™ instrument using 2,5-dihydroxyacetophenone or sinapic acid as matrix.

### Commercially available and previously characterized compounds:

Cysteamine hydrochloride was purchased from Fluka. Bovine serum albumin was purchased from US Biological. Glycerol phosphate was purchased from Sigma Aldrich (Milwaukee, WI: cat. no. G7886). The synthesis of the Gal<sup>f</sup>-biotin ligand was described previously<sup>1</sup>. Allyl-Gal<sup>f</sup>, allyl-KO<sup>2</sup>, allyl-KDO<sup>3</sup>, allyl-L,D-heptose<sup>4-6</sup>, and allyl-Neu5Ac<sup>7</sup> have all been previously synthesized and characterized. KO-BSA conjugate<sup>8</sup> and KDO-BSA conjugate<sup>9</sup> have also been previously synthesized and characterized.

## b. Experimental Procedures

### i. Synthesis of L,D-heptose BSA conjugate (4)

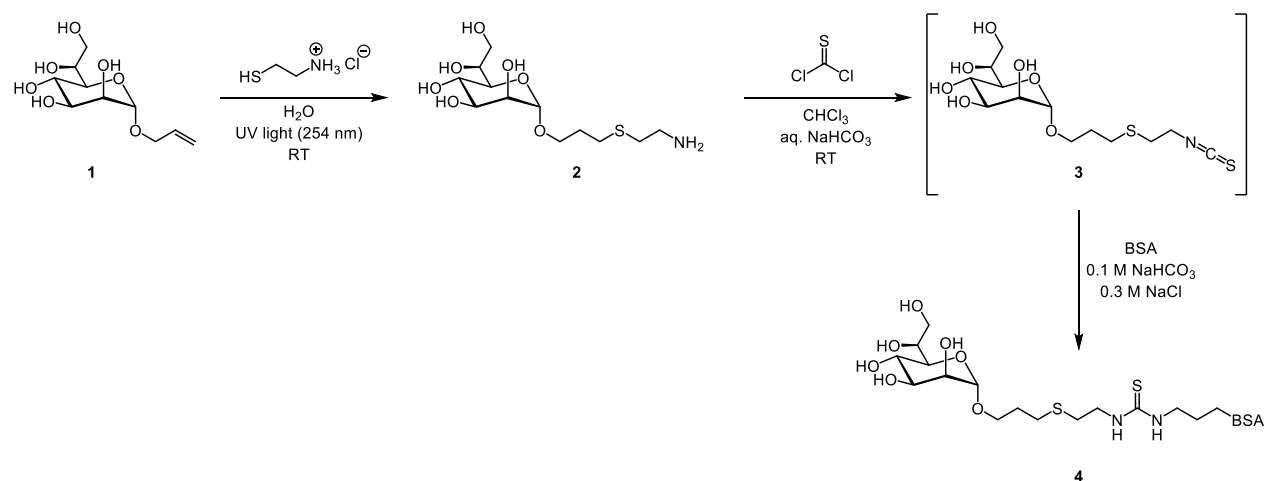

**3-(2-Aminoethylthio)propyl L-glycero- $\alpha$ -D-manno-heptopyranoside (2).** A solution of alkyl-L,D-heptose **1**<sup>4</sup> (6.0 mg, 24  $\mu$ mol) and cysteamine hydrochloride (2.7 mg, 24  $\mu$ mol) in H<sub>2</sub>O (0.1 mL) was irradiated at 254 nm for 3 h at RT. The reaction mixture was diluted with water and applied onto a column of Dowex 50 H<sup>+</sup> cation exchange resin (10 cm x 1 cm diameter). Elution with 0.1 M aq. NH<sub>3</sub> afforded first a pool containing unreacted educt and cysteamine followed by fractions containing **2**. Lyophilization of the latter fractions afforded **2** (4.5 mg, 52%) as an amorphous solid. <sup>1</sup>H NMR (600 MHz, D<sub>2</sub>O):  $\delta$  4.83 (d,  $J$  = 1.71 Hz, 1 H, H-1), 4.01 (ddd,  $J$  = 1.1, 5.3, 7.1 Hz, 1 H, H-6), 3.90 (dd,  $J$  = 1.7, 3.5 Hz, 1 H, H-2), 3.83 (t,  $J$  = 9.7 Hz, 1 H, H-4), 3.78-3.74 (m, 1 H, OCH<sub>2</sub>), 3.76 (dd,  $J$  = 3.4, 9.7 Hz, 1 H, H-3), 3.71 4.42 (dd,  $J$  = 7.6, 11.3 Hz, 1 H, H-7a), 3.67 (dd,  $J$  = 5.4, 11.3 Hz, 1 H, H-7b), 3.58-3.53 (m, 2, H-5, OCH<sub>2</sub>), 3.18 (t,  $J$  = 6.8 Hz, 0.6 H, NCH<sub>2</sub>), 2.98 (t,  $J$  = 6.7 Hz, 1.4 H, CH<sub>2</sub>N), 2.73 (t,  $J$  = 6.7 Hz, 1.4 H, SCH<sub>2</sub>), 2.66-2.61 (m, 2.4 H, SCH<sub>2</sub>), 1.92-1.84 (m, 2 H, CH<sub>2</sub>CH<sub>2</sub>S), 1.63-1.60 (m, 0.4 H, CH<sub>2</sub>CH<sub>2</sub>S); <sup>13</sup>C NMR (D<sub>2</sub>O):  $\delta$  100.6 (C-1), 72.1 (C-5), 71.7 (C-3), 70.9 (C-2), 69.6 (C-6), 66.9 (OCH<sub>2</sub>), 66.8 (C-4), 63.8 (C-7), 41.4 and 39.9 (NCH<sub>2</sub>), 31.8 and 28.4 (SCH<sub>2</sub>), 29.2 (CH<sub>2</sub>CH<sub>2</sub>S). ESI TOF HRMS:  $m/z$  calc'd for C<sub>12</sub>H<sub>25</sub>NO<sub>7</sub>S [M + H]<sup>+</sup> 328.1424; found 328.1429.

### BSA conjugate 4

A solution of **2** (4.5 mg, 12  $\mu$ mol) in 0.1 M NaHCO<sub>3</sub> (1.3 mL) was vigorously stirred with a solution of thiophosgene (2  $\mu$ L, 26  $\mu$ mol) in CHCl<sub>3</sub> (2 mL) for 1 h at RT to produce isocyanate **3**. The organic phase was removed using a pipette and the aqueous phase was extracted with three portions of CHCl<sub>3</sub>. Traces of organic solvent were then removed by using a stream of air until a clear solution was obtained. The water phase was then combined with a solution of BSA (2 mg) in 0.1 M NaHCO<sub>3</sub>/0.3 M NaCl (2 mL) and stirred



for 60 h at RT. The solution was twice dialyzed against water (2 L) and freeze-dried to give **4** as colorless powder (1.8 mg). MALDI-TOF-MS:  $M^+$  70096 (determined for BSA: 66488); 9.7 mol ligand/mol BSA.

## ii. Synthesis of allyl D,D-heptose (**8**)

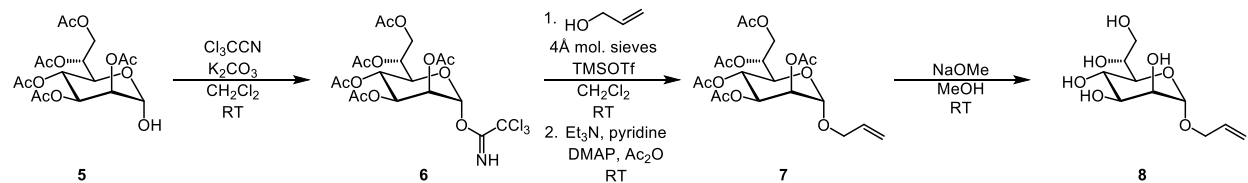

**2,3,4,6,7-Penta-O-acetyl-D-glycero- $\alpha$ -D-manno-heptopyranosyl trichloroacetimidate (**6**).** A suspension of 2,3,4,6,7-penta-O-acetyl-D,D-heptose **5**<sup>10</sup> (33.8 mg, 80  $\mu$ mol),  $K_2CO_3$  (140 mg, 1 mmol), and trichloroacetonitrile (65  $\mu$ L, 0.64 mmol) in dry  $CH_2Cl_2$  (5 mL) was stirred for 18 h at RT. Additional portions of  $K_2CO_3$  (40 mg) and trichloroacetonitrile (20  $\mu$ L) were added and stirring was continued for 3 h at RT. The suspension was diluted with toluene and concentrated. The residue was subjected to column chromatography on silica gel (toluene-EtOAc 3:1, containing 0.1% triethylamine) to give **6** (38 mg, 84%) as colorless prisms, m.p. 121-123° (from EtOAc-hexane), followed by the  $\beta$ -anomer (2 mg, 4%) as a syrup.  $^1H$  NMR (600 MHz,  $CDCl_3$ ) for **6**:  $\delta$  8.79 (NH), 6.26 (d,  $J$  = 2.1 Hz, 1 H, H-1), 5.44 (br t, 1 H, H-2), 5.40-5.36 (m, 2 H, H-3, H-4), 5.20 (dt,  $J$  = 2 x 3.5, 7.1 Hz, 1 H, H-6), 4.42 (dd,  $J$  = 3.8, 12.0 Hz, 1 H, H-7a), 4.26 (dd,  $J$  = 7.3, 12.0 Hz, 1 H, H-7b), 4.22-4.20 (m, H-5), 2.19 (s, 3 H), 2.11 (s, 3 H), 2.05 (s, 3 H), 2.04 (s, 3 H) and 2.00 (s, 3 H, 5 x  $CH_3CO$ ). Compound **6** was directly used for the glycosylation reaction.

**Allyl 2,3,4,6,7-penta-O-acetyl-D-glycero- $\alpha$ -D-manno-heptopyranoside (**7**).** A suspension of allyl alcohol (25  $\mu$ L, 0.37 mmol) and molecular sieves 4Å (200 mg) in dry  $CH_2Cl_2$  (5 mL) was stirred for 1 h at RT under Ar followed by addition of **6** (82 mg, 125  $\mu$ mol) in dry  $CH_2Cl_2$  (5 mL). Stirring was continued for 30 min and TMSO-triflate (6  $\mu$ L, 33  $\mu$ mol) was added. The suspension was stirred for 4 h at RT. Additional portions of allyl alcohol (25  $\mu$ L) and TMSO-triflate (4  $\mu$ L) were added and stirring was continued for 2 h. The reaction was quenched by addition of triethylamine (0.1 mL) at ice-bath temperature followed by addition of dry pyridine (2 mL), a catalytic amount of *N,N*-dimethylaminopyridine, and acetic anhydride (0.25 mL). The suspension was stirred overnight at RT. Methanol (0.2 mL) was added, the suspension was filtered over Celite®, concentrated, and coevaporated three times with toluene. The residue was purified by silica gel chromatography (toluene-EtOAc 2:1), which gave **7** (31.8 mg, 47%) as a syrup followed by a fraction of **7** containing 10% of the  $\beta$ -anomer (28.5 mg, 43%);  $[\alpha]_D^{20}$  +42 (*c* 0.3  $CHCl_3$ );  $^1H$  NMR (600 MHz,  $CDCl_3$ ):  $\delta$  5.89 (m, 1 H, =CH-), 5.34 (dd,  $J$  = 3.4, 9.8 Hz, 1 H, H-3), 5.30 (m, 1 H, =CH<sub>2trans</sub>), 5.27 (t,  $J$  = 9.9 Hz, 1 H, H-4), 5.24 (m, 1 H, =CH<sub>2cis</sub>), 5.22 (dd,  $J$  = 1.9, 3.4 Hz, 1 H, H-2), 5.19 (dt,  $J$  = 2 x 3.3, 6.9

Hz, 1 H, H-6), 4.83 (d,  $J = 1.8$  Hz, 1 H, H-1), 4.43 (dd,  $J = 3.6, 12.1$  Hz, 1 H, H-7a), 4.26 (dd,  $J = 7.4, 12.1$  Hz, 1 H, H-7b), 4.18 (m, 1 H, OCH<sub>2</sub>), 4.02 (m, 1 H, OCH<sub>2</sub>), 4.02 (dd,  $J = 3.4, 9.7$  Hz, 1 H, H-5), 2.15 (s, 3 H), 2.08 (2s, 9 H) and 1.99 (s, 3 H, 5 x CH<sub>3</sub>CO); <sup>13</sup>C NMR (150 MHz, CDCl<sub>3</sub>):  $\delta$  170.6, 169.6, 169.8 (2 C), and 169.7 (C=O), 132.9 (=CH-), 118.3 (=CH<sub>2</sub>), 96.4 (C-1), 70.3 (C-6), 69.9 (C-5), 69.5 (C-2), 69.2 (C-3), 68.4 (OCH<sub>2</sub>), 66.8 (C-4), 61.7 (C-7); ESI TOF HRMS:  $m/z$  calcd for C<sub>20</sub>H<sub>28</sub>O<sub>12</sub> [M + Na]<sup>+</sup> 483.1473; found 483.1483.

**Allyl D-glycero- $\alpha$ -D-manno-heptopyranoside (8).** A solution of **7** (15.5 mg, 33.7  $\mu$ mol) and 0.1 M methanolic NaOMe (0.2 mL) in dry MeOH (5 mL) was stirred for 4 h at RT. The pH of the solution was adjusted to 7 by addition of Dowex 50 H<sup>+</sup> cation-exchange resin and the resin was filtered off. The filtrate was concentrated to afford **8** (8.4 mg, ~99%) as a colorless syrup;  $[\alpha]_D^{20} +73.5$  ( $c$  0.4, H<sub>2</sub>O); <sup>1</sup>H NMR (600 MHz, D<sub>2</sub>O):  $\delta$  5.95 (m, 1 H, =CH-), 5.34 (m, 1 H, =CH<sub>2trans</sub>), 5.26 (m, 1 H, =CH<sub>2cis</sub>), 4.86 (d,  $J = 1.3$  Hz, 1 H, H-1), 4.21 (m, 1 H, OCH<sub>2</sub>), 4.04 (m, 1 H, OCH<sub>2</sub>), (dt,  $J = 2 \times 3.2, 7.6$  Hz, 1 H, H-6), 3.90 (dd, 1 H, H-2), 3.79 (dd,  $J = 3.4, 11.9$  Hz, 1 H, H-7a), 3.75 (dd,  $J = 3.2, 9.1$  Hz, 1 H, H-3), 3.73 (t,  $J = 9.2$  Hz, 1 H, H-4), 3.69 (dd,  $J = 7.7$  Hz, 1 H, H-7b); <sup>13</sup>C NMR (150 MHz, D<sub>2</sub>O):  $\delta$  134.1 (=CH-), 119.2 (=CH<sub>2</sub>), 99.8 (C-1), 73.8 (C-5), 72.6 (C-6), 71.7 (C-3), 70.7 (C-2), 68.9 (C-4), 68.2 (OCH<sub>2</sub>), 62.6 (C-7); ESI TOF HRMS:  $m/z$  calcd for C<sub>10</sub>H<sub>18</sub>O<sub>7</sub> [M+H]<sup>+</sup>: 251.1125; found: 251.1133.

### iii. Synthesis of D,D-heptose BSA conjugate (11)

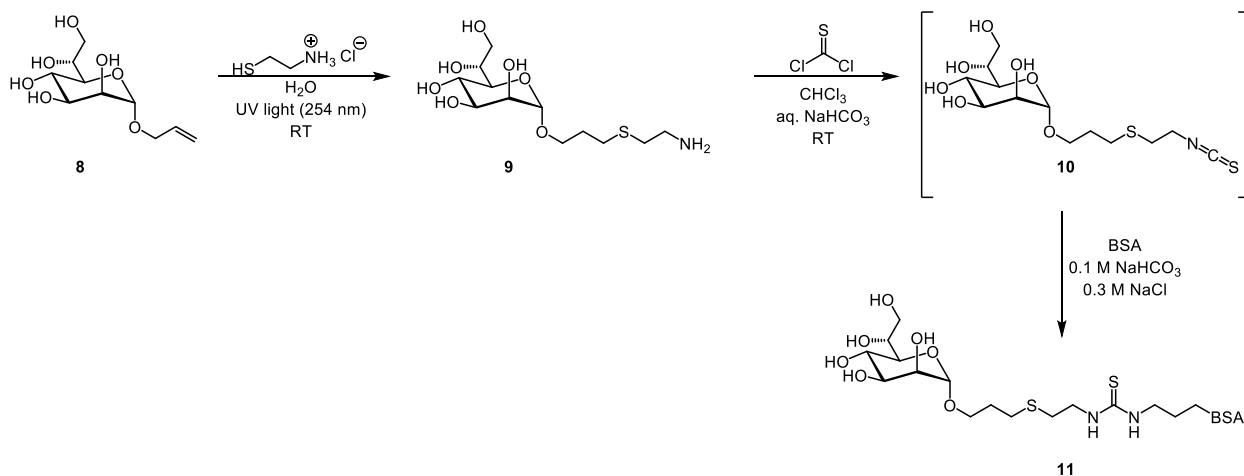

**3-(2-Aminoethylthio)propyl D-glycero- $\alpha$ -D-manno-heptopyranoside (9).** A solution of **8** (5.1 mg, 26  $\mu$ mol) and cysteamine hydrochloride (2.6 mg, 23  $\mu$ mol) in H<sub>2</sub>O (50  $\mu$ L) was irradiated at 254 nm for 3 h at RT. A second portion of cysteamine hydrochloride (2 mg, 17.6  $\mu$ mol) was added and irradiation was continued for 1.5 h. The reaction mixture was diluted with water and applied onto a column of Dowex 50 H<sup>+</sup> cation exchange resin (10 cm  $\times$  1 cm diameter). Elution with 0.1 M aq. NH<sub>3</sub> afforded first a pool

containing unreacted educt and cysteamine (3.9 mg) followed by fractions containing **9** and byproducts. Final elution of the column with copious volumes of 0.1 M NH<sub>3</sub> (100 mL) afforded **9**. In order to remove aromatic residuals released from the resin, the crude was dissolved in water and passed over anion-exchange resin Dowex AG 1-X8 (HCO<sub>3</sub><sup>-</sup> form). The resin was rinsed with water and the filtrate was lyophilized to give **9** (2.9 mg, 30%) as an amorphous solid. <sup>1</sup>H NMR (600 MHz, D<sub>2</sub>O): δ 4.81 (d, *J* = 1.7 Hz, 1 H, H-1), 4.00 (dt, *J* = 3.3 (2 x) and 7.6 Hz, 1 H, H-6), 3.88 (dd, *J* = 1.9, 2.6 Hz, 1 H, H-2), 3.79 (m, 1 H, OCH<sub>2</sub>), 3.78 (dd, *J* = 3.3, 11.9 Hz, 1 H, H-7a), 3.74-3.72 (m, 2 H, H-3, H-4), 3.69 (dd, *J* = 7.7, 12.0 Hz, 1H, H-7b), 3.67 (m, 1 H, H-5), 3.56 (dt, *J* = 5.8 Hz, 1 H, OCH<sub>2</sub>), 3.16 (t, *J* = 6.7, 10.1 Hz, 2 H, NCH<sub>2</sub>), 2.82 (t, *J* = 6.7 Hz, 2 H, SCH<sub>2</sub>CH<sub>2</sub>N), 2.68-2.63 (m, 2 H, CH<sub>2</sub>CH<sub>2</sub>CH<sub>2</sub>S), 1.93-1.84 (m, 2H, CH<sub>2</sub>CH<sub>2</sub>CH<sub>2</sub>); <sup>13</sup>C NMR (150 MHz, D<sub>2</sub>O): δ 100.3 (C-1), 73.7 (C-5), 72.3 (C-6), 71.6 (C-3), 70.3 (C-2), 68.1 (C-4), 66.7 (OCH<sub>2</sub>), 62.5 (C-7), 39.4 (CH<sub>2</sub>N), 29.3 (SCH<sub>2</sub>CH<sub>2</sub>N), 28.7 (CH<sub>2</sub>CH<sub>2</sub>CH<sub>2</sub>), 28.5 (CH<sub>2</sub>CH<sub>2</sub>CH<sub>2</sub>S); ESI TOF HRMS: *m/z* calcd for C<sub>12</sub>H<sub>25</sub>NO<sub>7</sub>S [M + H]<sup>+</sup> 328.1424; found 328.1429.

**BSA conjugate 11.** A solution of **9** (2.2 mg, 6 μmol) in 0.1 M NaHCO<sub>3</sub> (1.5 mL) was vigorously stirred with a solution of thiophosgene (1 μL, 13 μmol) in CHCl<sub>3</sub> (1 mL) for 2 h at RT to provide isocyanate **10**. The organic phase was removed using a pipette and the aqueous phase was extracted with four portions of CHCl<sub>3</sub>. Traces of organic solvent were then removed by using a stream of N<sub>2</sub> until a clear solution was obtained. The water phase was then added to a solution of BSA (1.7 mg) in 0.1 M NaHCO<sub>3</sub>/0.3 M NaCl (1.5 mL) and stirred for 48 h at RT. The solution was twice dialyzed against water (2 L) and freeze-dried to give **11** as an off-white powder (2.2 mg). MALDI-TOF-MS: M+ 69021 (determined for BSA: 66488); 6.8 mol ligand/mol BSA.

#### iv. Synthesis of Gal<sup>f</sup>-BSA conjugate (15)

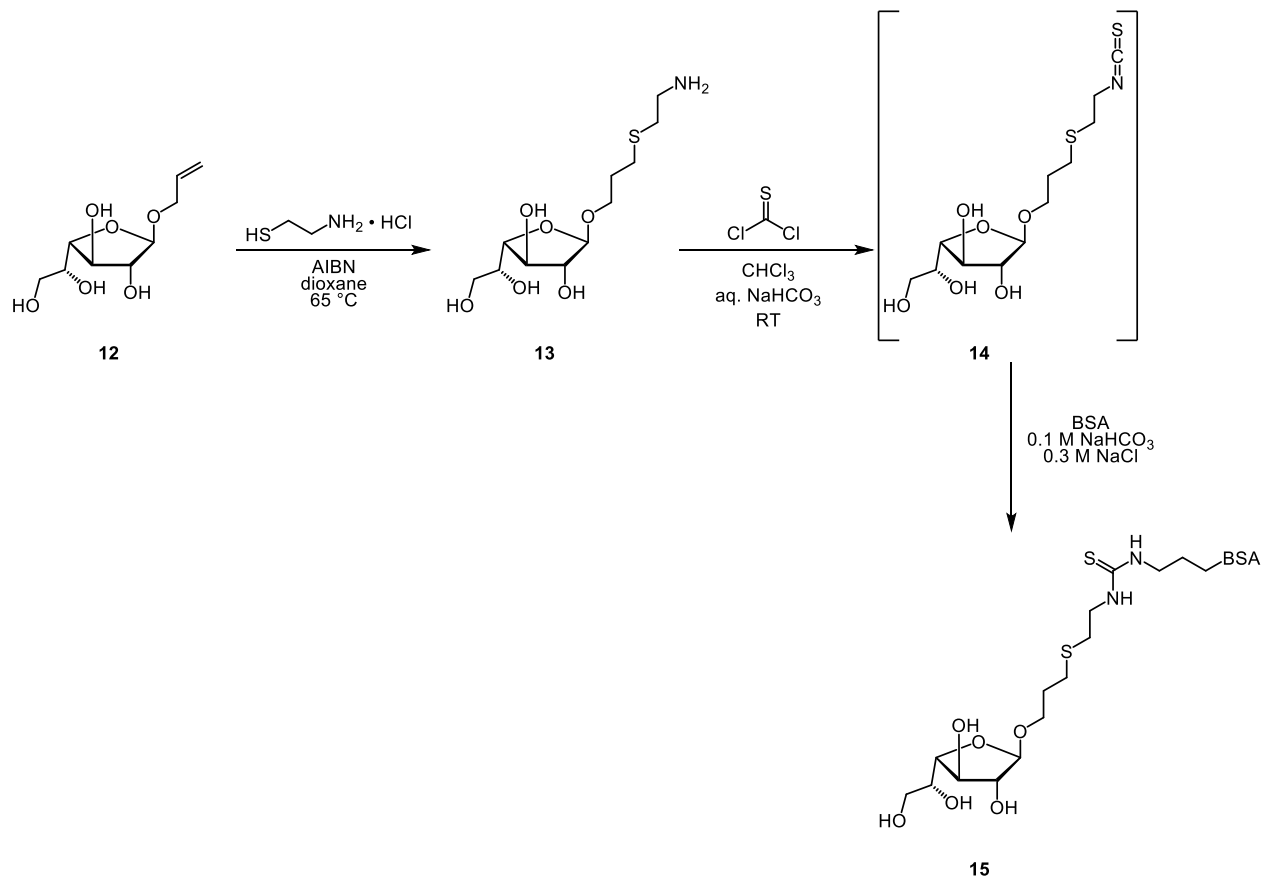

**3-(2-Aminoethylthio)propyl-β-D-galactofuranoside (13).** Allyl β-D-galactofuranose<sup>1</sup> (**12**) (12.6 mg, 0.057 mmol) was dissolved in anhydrous dioxane (Sigma-Aldrich, SureSeal) (219 μL, 0.26 M), along with cysteamine hydrochloride (32.4 mg, 0.285 mmol) and azobisisobutyronitrile (AIBN) (2.8 mg, 0.017 mmol), and heated to 65 °C. The reaction mixture was stirred for 3 h, diluted with methanol, and concentrated by rotary evaporation. The resulting product was purified on Dowex 50Wx8 H<sup>+</sup> resin (100-200 mesh). The resin was pretreated with two cycles of 3N HCl, H<sub>2</sub>O until neutral, 1.5 M NaOH, H<sub>2</sub>O until neutral. After these cycles, the resin was again treated with 3N HCl and rinsed with water. The reaction mixture was added to the resin and eluted with 0.1 M aq. NH<sub>3</sub>. Unreacted cysteamine began eluting off the column when the color change (orange-brown) reached the bottom of the column. Fractions were monitored using TLC staining with p-anisaldehyde. After cysteamine finished eluting, product was collected and fractions were evaporated, yielding 20 mg of **13** (quant.) as a solid. Analytical data for **13**: <sup>1</sup>H NMR (600 MHz, D<sub>2</sub>O): δ 5.01 (d, *J* = 2.1 Hz, 1H), 4.10 – 4.04 (m, 2H), 3.97 (dd, *J* = 6.4, 4.0 Hz, 1H), 3.87 – 3.81 (m, 2H), 3.74 – 3.63 (m, 3H), 2.93 (t, *J* = 6.6 Hz, 2H), 2.73 (t, *J* = 6.6 Hz, 2H), 2.67 (t, *J* = 7.3 Hz, 3H), 1.91 (quint, *J* = 6.7 Hz, 2H); <sup>13</sup>C NMR (151 MHz, D<sub>2</sub>O): δ 110.0, 85.5, 83.8, 79.3, 73.6, 69.6, 65.6, 41.9, 34.3, 31.6, 30.2;

DART-SVP HRMS (positive ion mode) calculated for  $C_{11}H_{23}NO_6S$   $[M+H]^+ = 298.13243$ , found = 298.13242.

**BSA conjugate 15.** A solution of **13** (20 mg, 0.06 mmol) in 0.1 M  $NaHCO_3$  (7.5 mL) was stirred at RT. A solution of thiophosgene (12.4  $\mu$ L, 0.162 mmol) in  $CHCl_3$  (4.6 mL) was added. The reaction mixture was stirred vigorously at RT overnight to produce isocyanate **14**. The reaction mixture was extracted with  $CHCl_3$  three times, and the aqueous layer was sparged with nitrogen to remove any remaining  $CHCl_3$ . The resulting aqueous solution was added to a solution of bovine serum albumin (BSA) (30 mg) in 4.7 mL buffer (0.1 M  $NaHCO_3$ , 0.3 M NaCl). The reaction mixture was stirred slowly at RT for 48 h. The reaction mixture was then dialyzed into water (20,000 MW cassette) for 2 h, then 24 h, then 24 h. The resulting solution was lyophilized to produce 27.8 mg of **15** as a white solid. A 20  $\mu$ M sample of **15** was made in water and mixed with a saturated sinapic acid matrix solution (30:70 acetonitrile:water) in a 1:1 ratio for MALDI characterization. MALDI-TOF-MS:  $M^+$  70443 (determined for BSA: 66933); 10 mol ligand/mol BSA.

#### v. Synthesis of Neu5Ac-BSA conjugate (19)

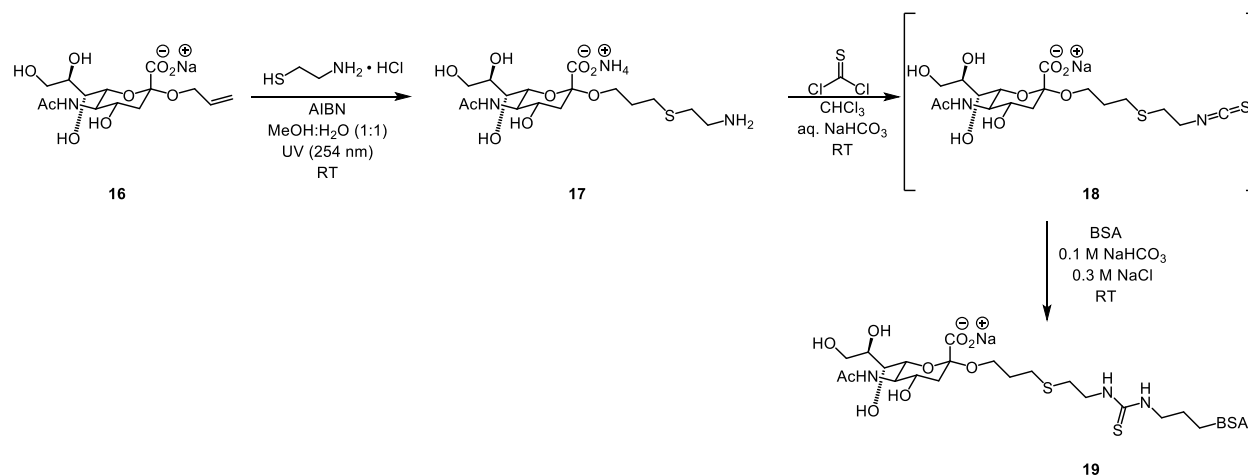

**2-O-[3-(2-aminoethylthio)propyl]-3,5-dideoxy-5-acetamino-D-glycero- $\alpha$ -D-galacto-2-nonulopyranosidonic acid (2-O-[3-(2-aminoethylthio)propyl] sialic acid) (**17**).** Allyl  $\alpha$ -Neu5Ac<sup>7</sup> (**16**) (10 mg, 26  $\mu$ mol) was dissolved in a 1:1 methanol:water mixture (400  $\mu$ L) in a quartz reaction tube, along with cysteamine hydrochloride (14.8 mg, 130  $\mu$ mol) and azobisisobutyronitrile (AIBN) (1.6 mg, 10  $\mu$ mol). The tube was stirred at RT overnight in a UV reactor, exposed to 254 nm light. The mixture was then diluted with methanol and concentrated by rotary evaporation. The product was purified as described for **13** (Dowex resin, elution with aq.  $NH_3$ ) to provide 3.3 mg of **17** as a solid. Analytical data for **17** matched that of literature data.<sup>11</sup>

**BSA conjugate 19.** A solution of **17** (3.3 mg, 7  $\mu$ mol) in 0.1 M NaHCO<sub>3</sub> (875  $\mu$ L) was stirred at RT. A solution of thiophosgene (2  $\mu$ L, 19  $\mu$ mol) in CHCl<sub>3</sub> (540  $\mu$ L) was added. The reaction mixture was stirred vigorously at RT overnight to produce isocyanate **18**. The reaction mixture was extracted with CHCl<sub>3</sub> three times, and the aqueous layer was sparged with nitrogen to remove any remaining CHCl<sub>3</sub>. The resulting aqueous solution was added to a solution of bovine serum albumin (BSA) (3.5 mg) in 550  $\mu$ L of buffer (0.1 M NaHCO<sub>3</sub>, 0.3 M NaCl). The reaction mixture was stirred slowly at RT for 48 h. The reaction mixture was then dialyzed into water (20,000 MW cassette) for 2 h, then 24 h, then 24 h. The final product was lyophilized to produce 3.95 mg of **19** as a white solid. A 20  $\mu$ M sample of **19** was made in water and mixed with a saturated sinapic acid matrix solution (30:70 acetonitrile:water) in a 1:1 ratio for MALDI characterization. MALDI-TOF-MS: M+ 72023 (determined for BSA: 66943); 10.3 mol ligand/mol BSA

### III. References

1. Wesener, D. A.; Wangkanont, K.; McBride, R.; Song, X.; Kraft, M. B.; Hodges, H. L.; Zarling, L. C.; Splain, R. A.; Smith, D. F.; Cummings, R. D.; Paulson, J. C.; Forest, K. T.; Kiessling, L. L. Recognition of microbial glycans by human intelectin-1. *Nat. Struct. Mol. Biol.* **2015**, *22* (8), 603-610.
2. Kosma, P.; Strobl, M.; März, L.; Kusumoto, S.; Fukase, K.; Brade, L.; Brade, H. Synthesis and immunoreactivity of poly(acrylamide) copolymers containing C-3- and C-7-modified, carboxyl-reduced, 4-O- and 5-O-phosphorylated K. *Carbohydr. Res.* **1993**, *238*, 93-107.
3. Kosma, P.; Gass, J.; Schulz, G.; Christian, R.; Unger, F. M. Artificial antigens. Synthesis of polyacrylamide copolymers containing 3-deoxy-D-manno-2-octulopyranosylonic acid (KDO) residues. *Carbohydr. Res.* **1987**, *167*, 39-54.
4. Paulsen, H.; Wulff, A.; Brenken, M. Bausteine von Oligosacchariden, IC. Darstellung von synthetischen Antigenen der inneren Core-Region von Lipopolysacchariden durch Copolymerisation mit Acrylamid. **1991**, *11*, 1127-1145.
5. Reiter, A.; Zamyatina, A.; Schindl, H.; Hofinger, A.; Kosma, P. Synthesis of *Pseudomonas aeruginosa* lipopolysaccharide core antigens containing 7-O-carbamoyl-L-glycero- $\alpha$ -D-manno-heptopyranosyl residues. *Carbohydr. Res.* **1999**, *317* (1), 39-52.
6. Marchetti, R.; Malinowska, L.; Lameignère, E.; Adamova, L.; de Castro, C.; Cioci, G.; Stanetty, C.; Kosma, P.; Molinaro, A.; Wimmerova, M.; Imberty, A.; Silipo, A. Burkholderia cenocepacia lectin A binding to heptoses from the bacterial lipopolysaccharide. *Glycobiology* **2012**, *22* (10), 1387-1398.
7. Roy, R.; Laferrière, C. A. Synthesis of protein conjugates and analogues of N-acetylneuraminic acid. *Can. J. Chem.* **1990**, *68* (11), 2045-2054.
8. Wimmer, N.; Brade, H.; Kosma, P. Synthesis of neoglycoproteins containing D-glycero-D-talo-oct-2-ulopyranosylonic acid (KO) ligands corresponding to core units from Burkholderia and Acinetobacter lipopolysaccharide. *Carbohydr. Res.* **2000**, *329* (3), 549-560.
9. Holst, O.; Brade, L.; Kosma, P.; Brade, H. Structure, serological specificity, and synthesis of artificial glycoconjugates representing the genus-specific lipopolysaccharide epitope of Chlamydia spp. *J. Bacteriol.* **1991**, *173* (6), 1862-1866.
10. Zamyatina, A.; Gronow, S.; Puchberger, M.; Graziani, A.; Hofinger, A.; Kosma, P. Efficient chemical synthesis of both anomers of ADP L-glycero- and D-glycero-D-manno-heptopyranose. *Carbohydr. Res.* **2003**, *338* (23), 2571-2589.
11. Roy, R.; Laferrière, C. A. Synthesis of antigenic copolymers of N-acetylneuraminic acid binding to wheat germ agglutinin and antibodies. *Carbohydr. Res.* **1988**, *177*, c1-c4.

#### IV. $^1\text{H}$ and $^{13}\text{C}$ NMR Spectra

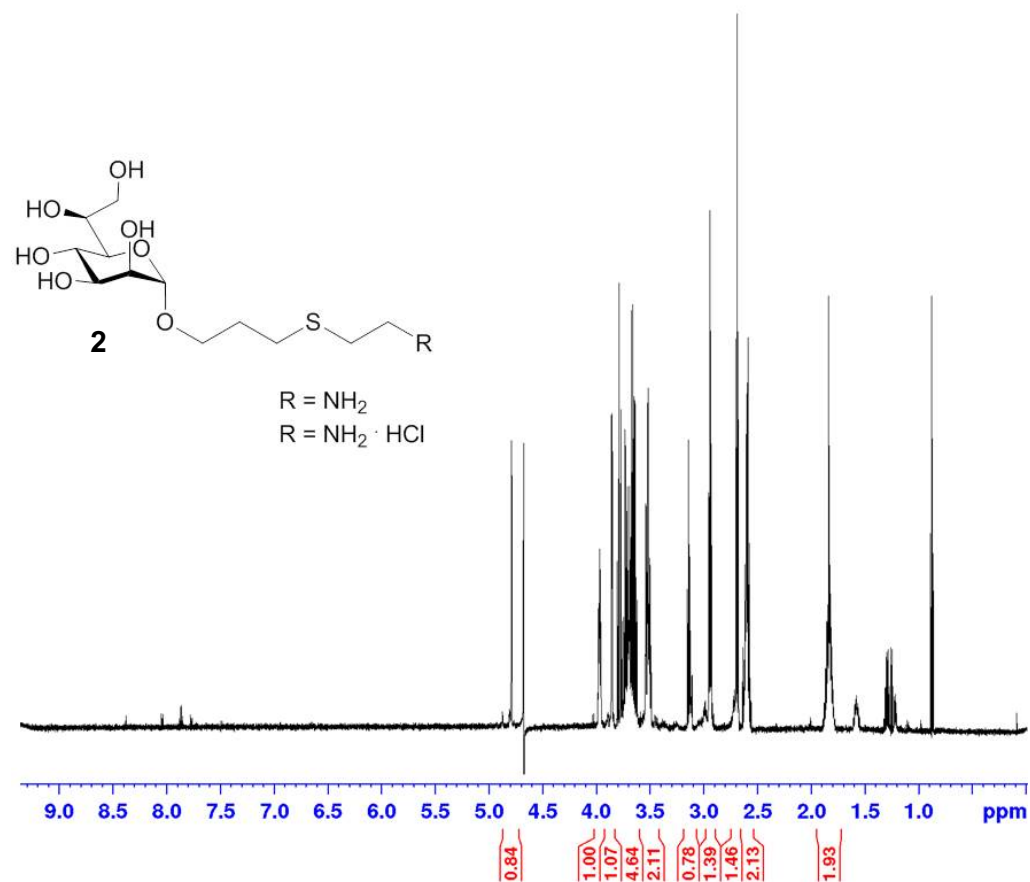

Fig. S6. 600 MHz  $^1\text{H}$  NMR spectrum of **2**.



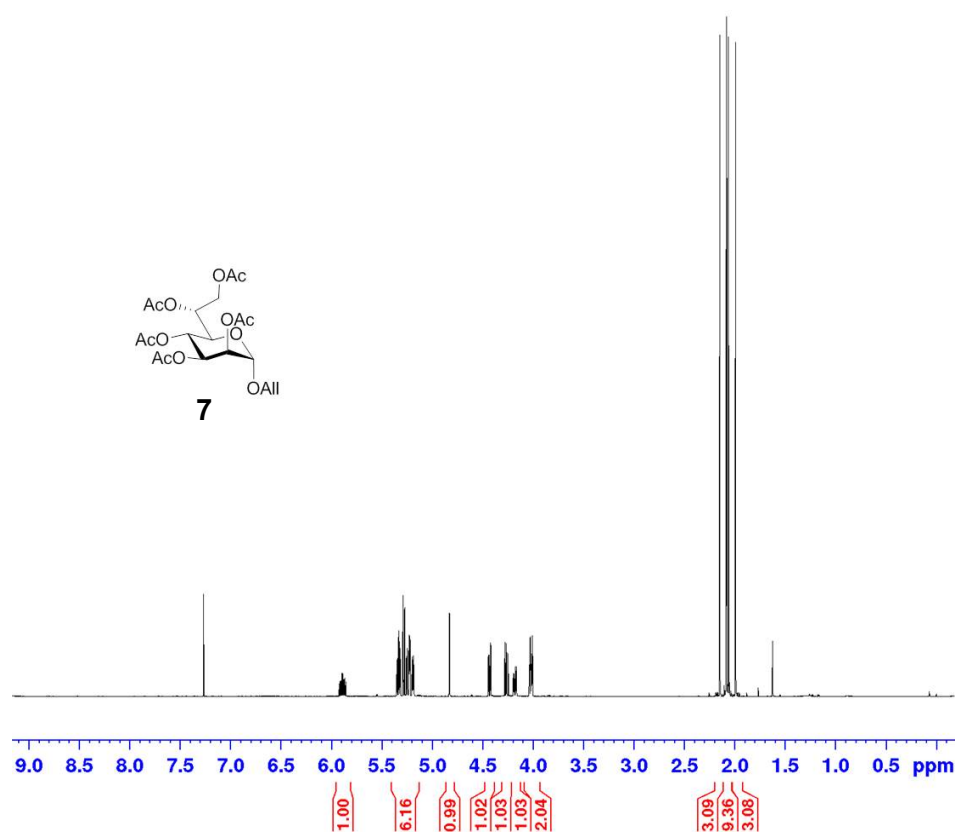

Fig. S7. 600 MHz <sup>1</sup>H NMR spectrum of **7**.

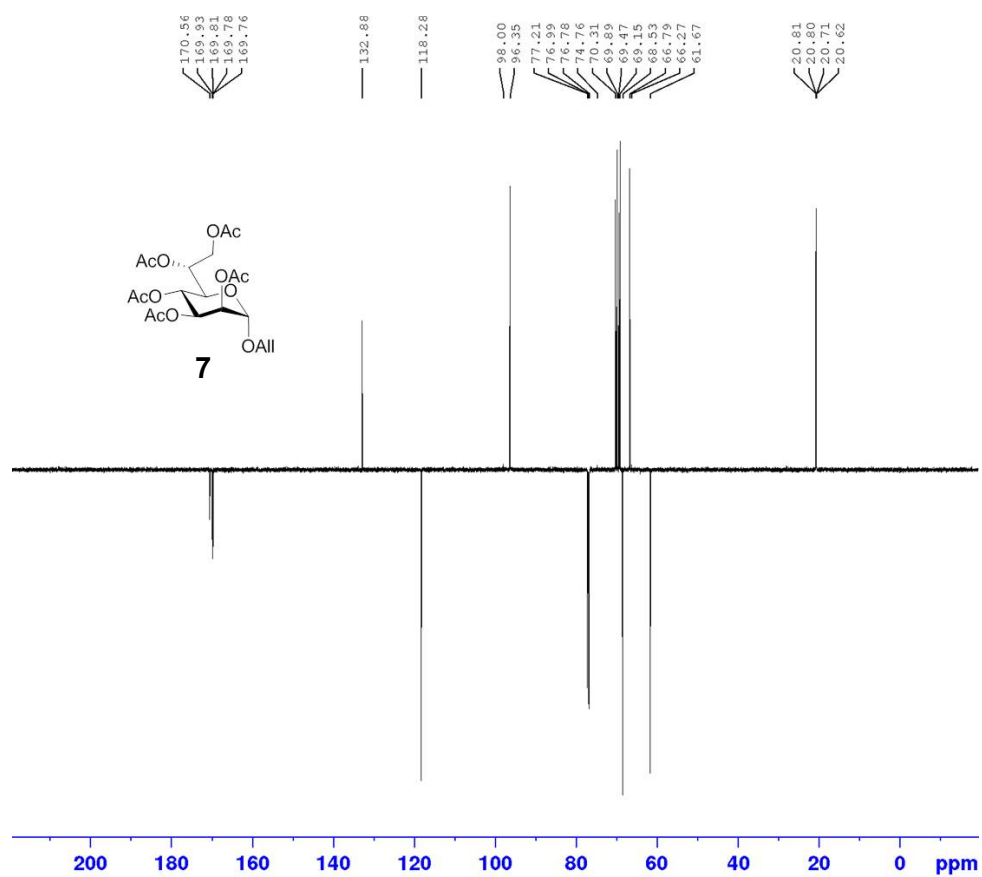

Fig. S8. 150 MHz  $^{13}\text{C}$  NMR spectrum of 7.

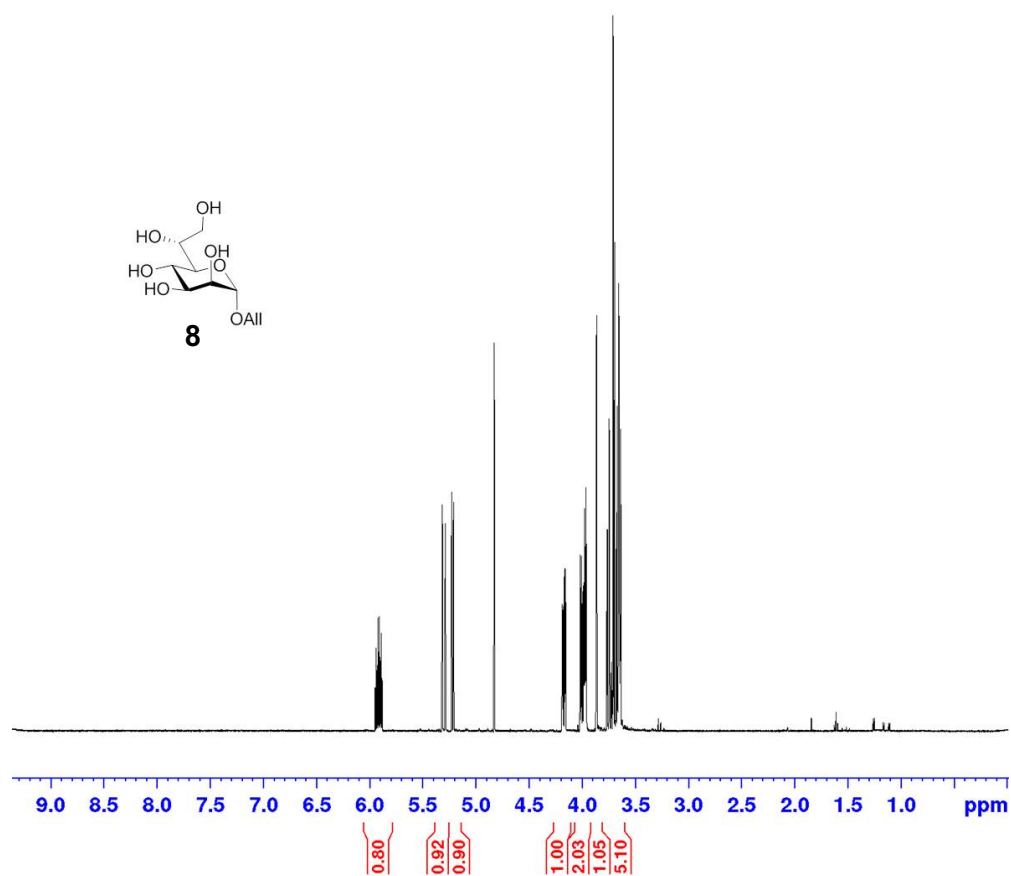

Fig. S9. 600 MHz  $^1\text{H}$  NMR spectrum of **8**.

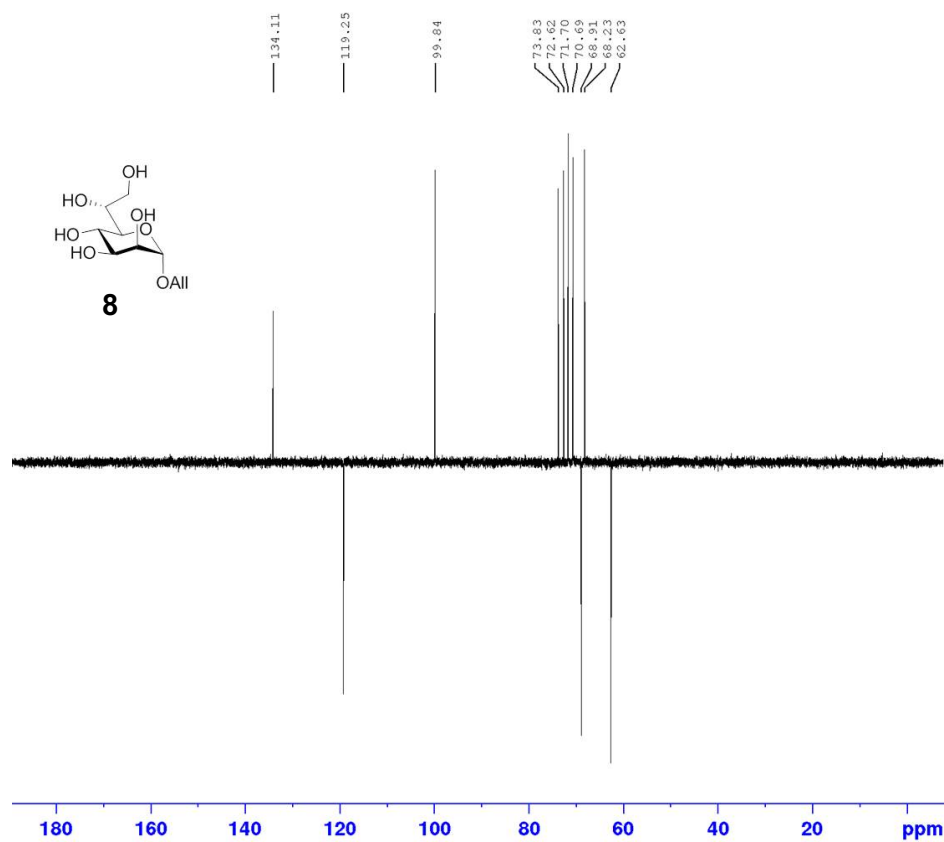

Fig. S10. 150 MHz <sup>13</sup>C NMR spectrum of **8**.

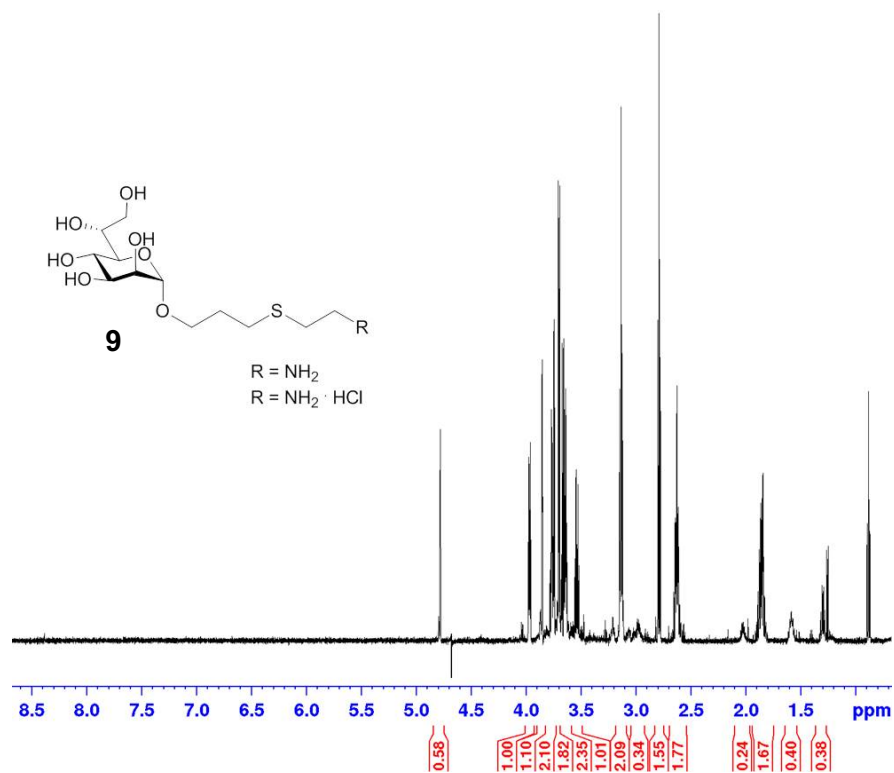

Fig. S11. 600 MHz <sup>1</sup>H NMR spectrum of **9**.

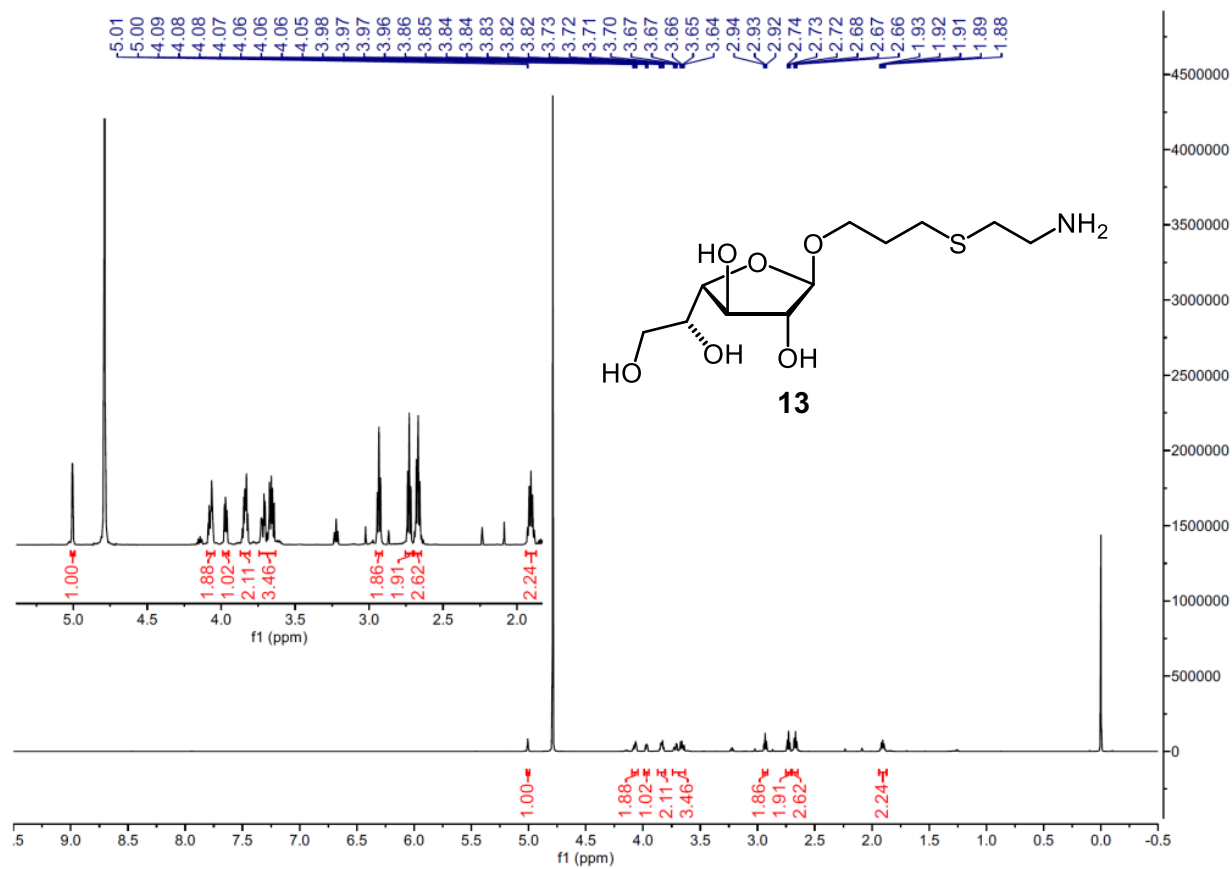

Fig. S12. 600 MHz  $^1\text{H}$  NMR spectrum of **13**.

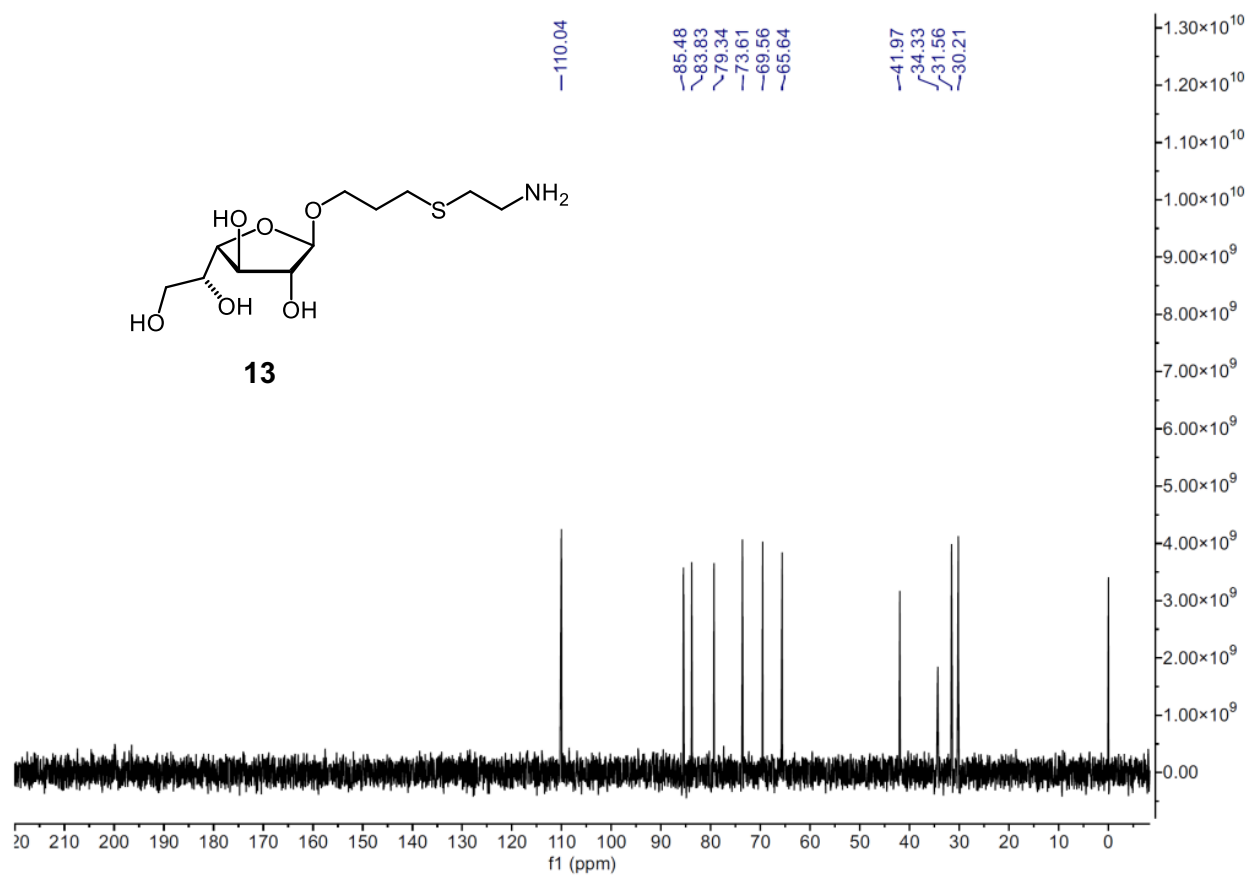

Fig. S13. 151 MHz <sup>13</sup>C NMR spectrum of **13**.

## V. MALDI Spectra of BSA Conjugates

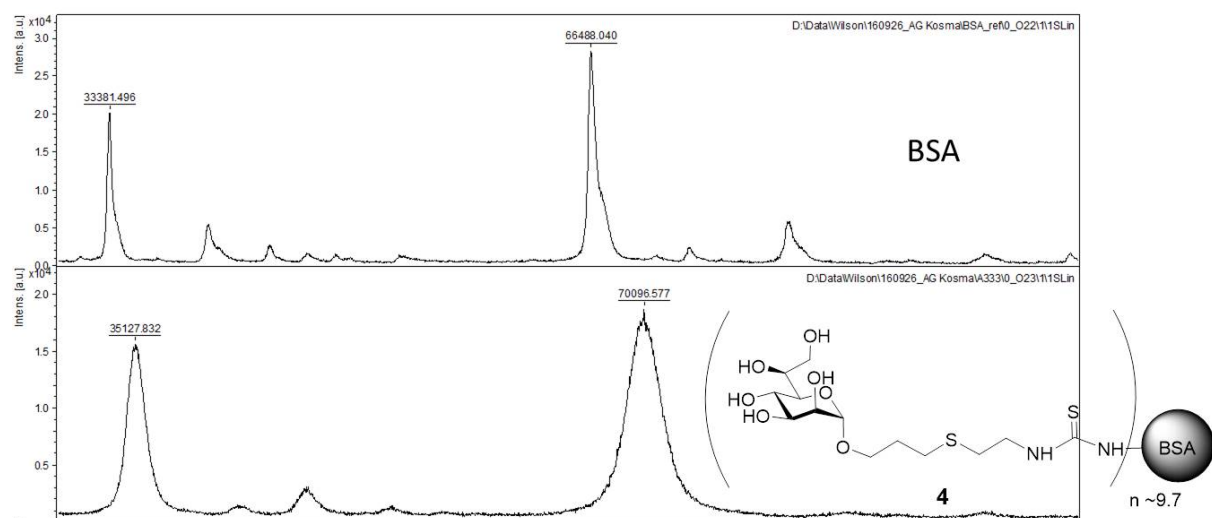

Fig. S14 MALDI-TOF spectra of BSA (top) and BSA conjugate **4**.

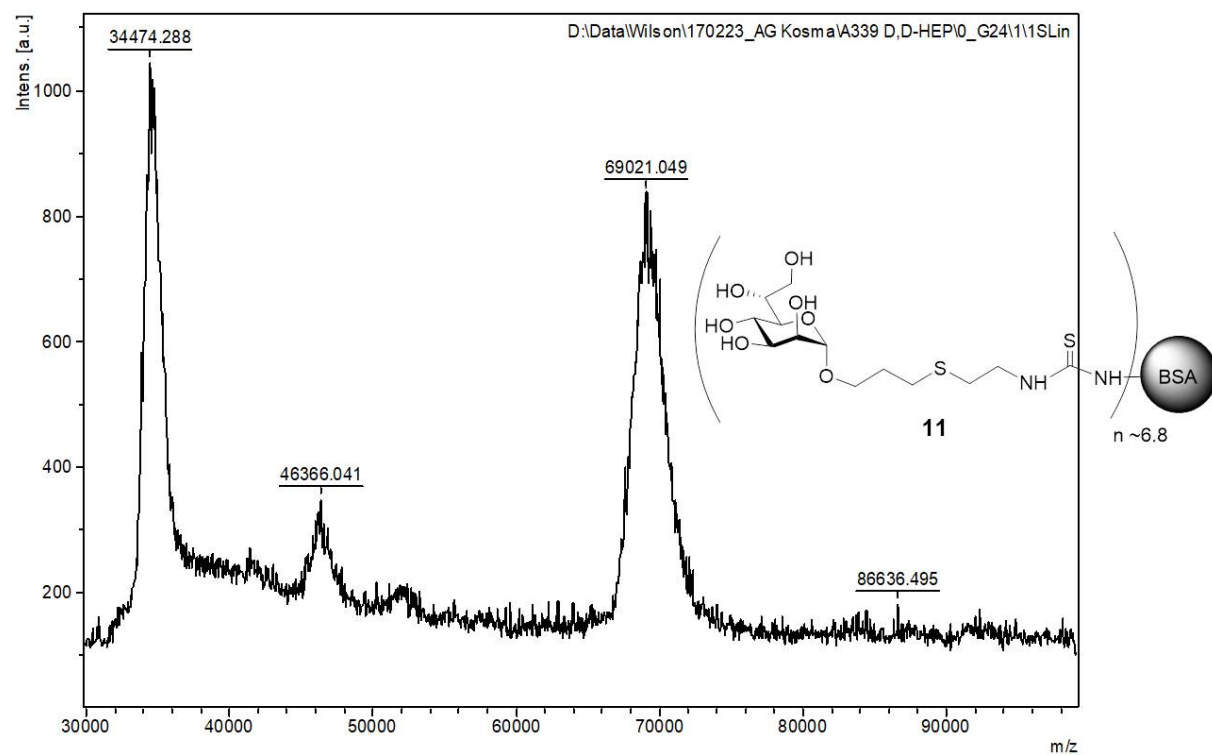

Fig. S15. MALDI-TOF spectrum of BSA conjugate **11**.

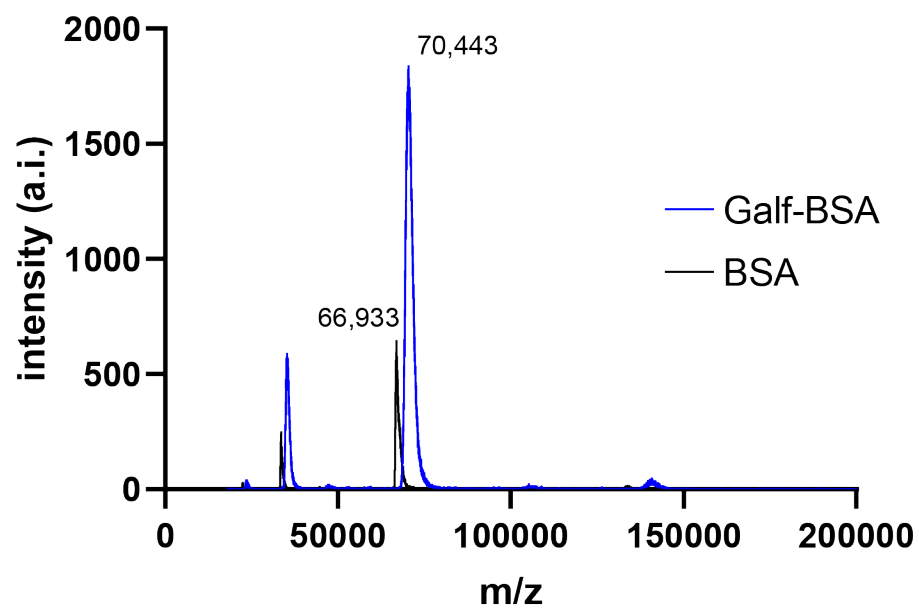

Fig. S16. MALDI-TOF spectra of BSA and BSA conjugate **15**.

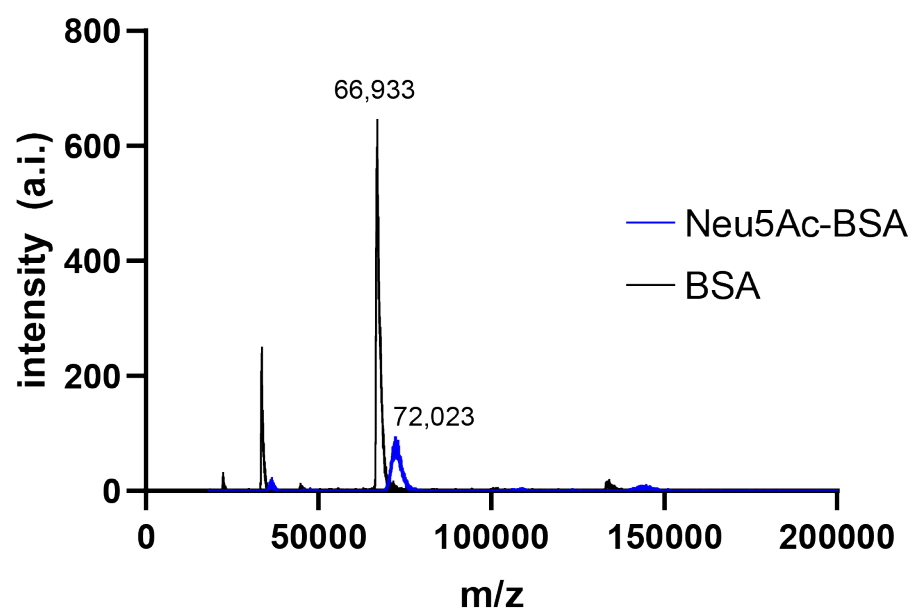

Fig. S17. MALDI-TOF spectra of BSA and BSA conjugate **19**.
